# Supplementary material for: Persistence Length of PEGMA Bottle Brushes Determined by Pyrene Excimer Fluorescence
Source: MDPI journal article supplement (doi:10.3390/polym15193958), 2023-09-30
Supplement: s1 [file s1]

**Supporting Information for**

**Persistence Length of PEGMA Bottle Brushes  
Determined by Pyrene Excimer Fluorescence**

Janine L. Thoma, Hunter Little, Jean Duhamel\*

Institute for Polymer Research, Waterloo Institute for Nanotechnology, Department of  
Chemistry, University of Waterloo, Waterloo, ON N2L 3G1, Canada

Lei Zhang, Kam Tong Leung

WATLab and Department of Chemistry, University of Waterloo, Waterloo, ON N2L3G1,  
Canada

\* To Whom correspondence should be addressed.

Jean Duhamel: [jduhamel@uwaterloo.ca](mailto:jduhamel@uwaterloo.ca)

Kam Tong Leung : [tong@uwaterloo.ca](mailto:tong@uwaterloo.ca)

## Table of Contents

|                                                                                  |       |
|----------------------------------------------------------------------------------|-------|
| A] <i>Fluorescence Blob Model (FBM) Equations</i> .....                          | 3-4   |
| B] <i><sup>1</sup>H NMR spectra</i> .....                                        | 5-8   |
| C] <i>Gel permeation chromatography</i> .....                                    | 9-10  |
| D] <i>Steady-state fluorescence spectra and <math>I_E/I_M</math> plots</i> ..... | 11-15 |
| E] <i>Sample fit of the global FBM analysis of the fluorescence decays</i> ..... | 16    |
| F] <i>Parameters retrieved from the FBM analysis</i> .....                       | 17-28 |
| G] <i>References</i> .....                                                       | 29    |

## A] Equations used to analyze the fluorescence decays of the PyEG<sub>5</sub>-PEG<sub>n</sub>MA samples

Equations S1 and S2 were employed to globally fit the monomer and excimer fluorescence decays of the PyEG<sub>5</sub>-PEG<sub>n</sub>MA samples, respectively.<sup>1,2</sup>

$$\begin{aligned}
 [Py^*]_{(t)} = & [Py_{diff}^*]_{(t)} + [Py_{k2}^*]_{(t)} + [Py_{free}^*]_{(t)} = [Py_{diff}]_o \exp\left(-\left(A_2 + \frac{1}{\tau_M}\right)t - A_3(1 - \exp(-A_4 t))\right) \\
 & + \left([Py_{k2}]_o + [Py_{diff}]_o e^{-A_3} \sum_{i=0}^{\infty} \frac{A_3^i}{i!} \frac{A_2 + iA_4}{A_2 + iA_4 - k_2}\right) \exp\left(-\left(k_2 + \frac{1}{\tau_M}\right)t\right) \\
 & - [Py_{diff}]_o e^{-A_3} \sum_{i=0}^{\infty} \frac{A_3^i}{i!} \frac{A_2 + iA_4}{A_2 + iA_4 - k_2} \exp\left(-\left(A_2 + iA_4 + \frac{1}{\tau_M}\right)t\right) \\
 & + [Py_{free}]_o \exp\left(-\frac{t}{\tau_M}\right) \quad (S1)
 \end{aligned}$$

$$\begin{aligned}
 [E^*]_{(t)} = & [E0^*]_{(t)} + [D^*]_{(t)} = k_2 \left( \left( [Py_{k2}(E0)]_o + [Py_{diff}(E0)]_o e^{-A_3} \sum_{i=0}^{\infty} \frac{A_3^i}{i!} \frac{A_2 + iA_4}{A_2 + iA_4 - k_2} \right) \right. \\
 & \times \frac{\exp\left(-\frac{t}{\tau_{E0}}\right) - \exp\left(-\left(k_2 + \frac{1}{\tau_M}\right)t\right)}{k_2 + \frac{1}{\tau_M} - \frac{1}{\tau_{E0}}} \\
 & \left. + [Py_{diff}(E0)]_o e^{-A_3} \sum_{i=0}^{\infty} \frac{A_3^i}{i!} \frac{A_2 + iA_4}{A_2 + iA_4 - k_2} \frac{\exp\left(-\left(A_2 + iA_4 + \frac{1}{\tau_M}\right)t\right) - \exp\left(-\frac{t}{\tau_{E0}}\right)}{A_2 + iA_4 + \frac{1}{\tau_M} - \frac{1}{\tau_{E0}}} \right)
 \end{aligned}$$

$$\begin{aligned}
& + k_2 \left( \left( [Py_{k_2}(D)]_o + [Py_{diff}(D)]_o e^{-A_3} \sum_{i=0}^{\infty} \frac{A_3^i}{i!} \frac{A_2 + iA_4}{A_2 + iA_4 - k_2} \right) \times \frac{\exp\left(-\frac{t}{\tau_D}\right) - \exp\left(-\left(k_2 + \frac{1}{\tau_M}\right)t\right)}{k_2 + \frac{1}{\tau_M} - \frac{1}{\tau_D}} \right. \\
& \quad \left. + [Py_{diff}(D)]_o e^{-A_3} \sum_{i=0}^{\infty} \frac{A_3^i}{i!} \frac{A_2 + iA_4}{A_2 + iA_4 - k_2} \frac{\exp\left(-\left(A_2 + iA_4 + \frac{1}{\tau_M}\right)t\right) - \exp\left(-\frac{t}{\tau_D}\right)}{A_2 + iA_4 + \frac{1}{\tau_M} - \frac{1}{\tau_D}} \right) \\
& \quad + [E0]_o \times \exp\left(-\frac{t}{\tau_{E0}}\right) + [D]_o \times \exp\left(-\frac{t}{\tau_D}\right) \Big] \tag{S2}
\end{aligned}$$

In Equations S1 and S2, the parameters  $A_2$ ,  $A_3$ , and  $A_4$  are given in Equations S3.a–c.

$$A_2 = \langle n \rangle \times \frac{k_{blob} k_e [blob]}{k_{blob} + k_e [blob]} \tag{S3.a}$$

$$A_3 = \langle n \rangle \times \left( \frac{k_{blob}}{k_{blob} + k_e [blob]} \right)^2 \tag{S3.b}$$

$$A_4 = k_{blob} + k_e [blob] \tag{S3.c}$$

## B] $^1\text{H}$ NMR spectra

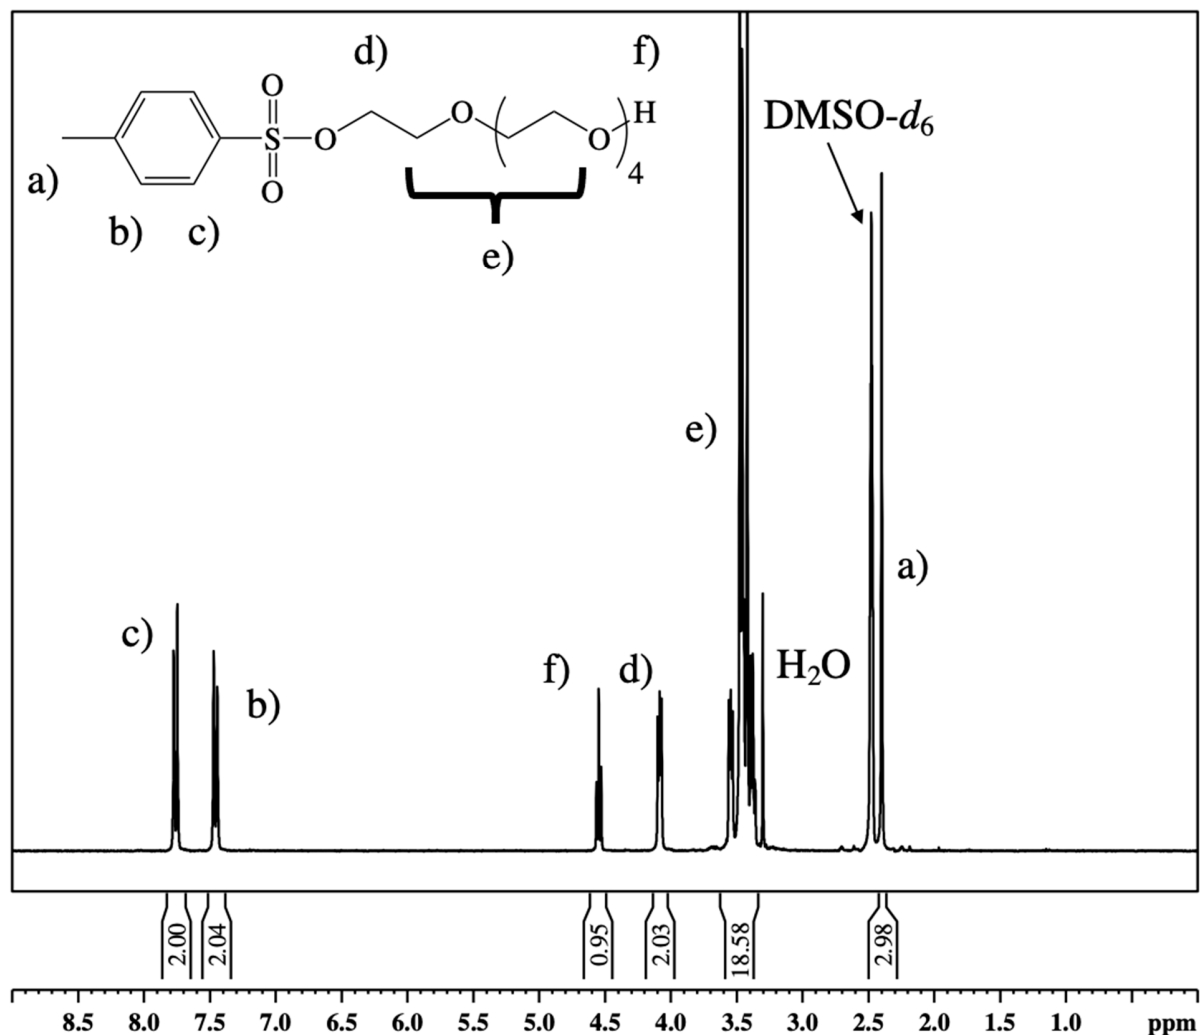

**Figure S1.**  $^1\text{H}$  NMR spectrum of penta(ethylene glycol) mono *p*-toluene sulfonate. (DMSO-*d*<sub>6</sub>, 300 MHz),  $\delta$  2.40 (s, 3H), 3.34-3.59 (m, 18H), 4.08 (t, 2H), 4.54 (t, 1H), 7.44 (d, 2H), 7.76 (d, 2H).

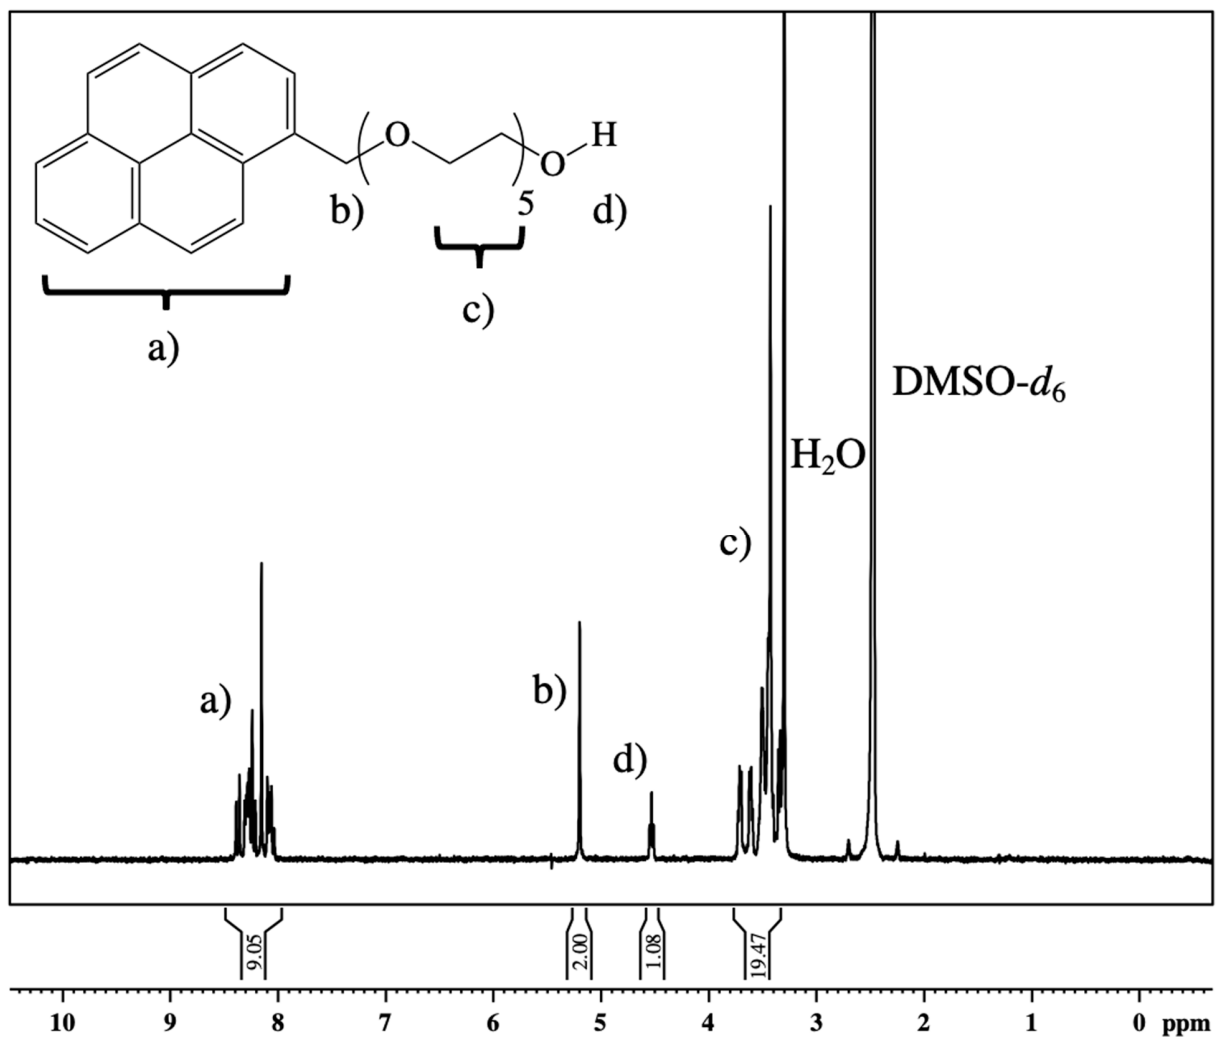

**Figure S2.**  $^1\text{H}$  NMR spectrum of 1-pyrenemethyl ether penta(ethylene glycol) ( $\text{DMSO}-d_6$ , 300 MHz),  $\delta$  3.33-3.74 (m, 20H), 4.53 (t, 1H), 5.20 (s, 2H), 8.02-8.41 (m, 9H).

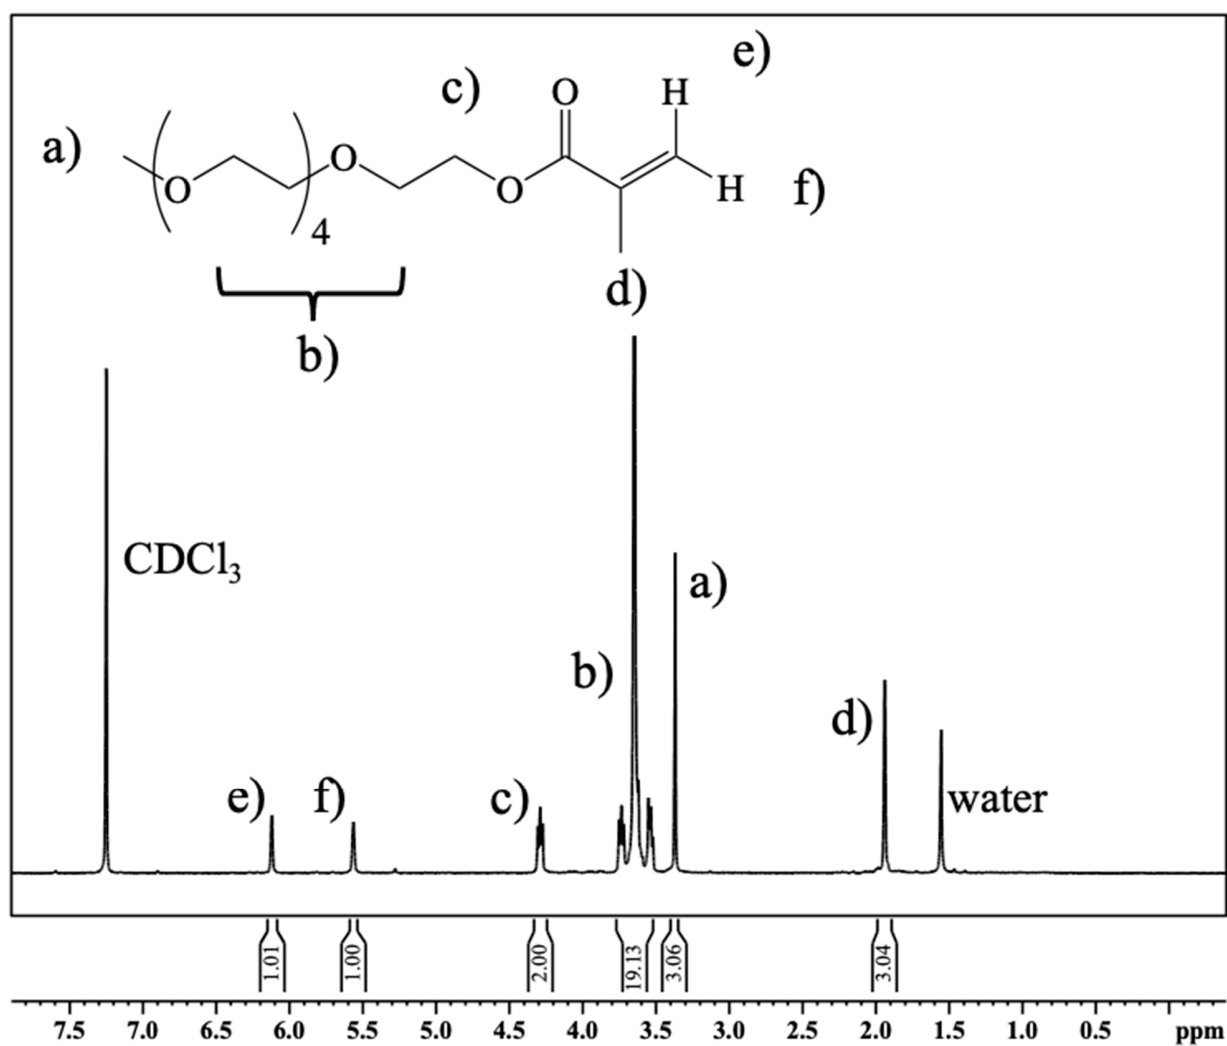

**Figure S3.**  $^1\text{H}$  NMR spectrum of penta(ethylene glycol) methyl ether methacrylate (CDCl<sub>3</sub>, 300 MHz),  $\delta$  1.94 (s, 3H), 3.37 (s, 3H), 3.51-3.77 (m, 18H), 4.29 (t, 2H), 5.57 (s, 1H), 6.13 (s, 1H).

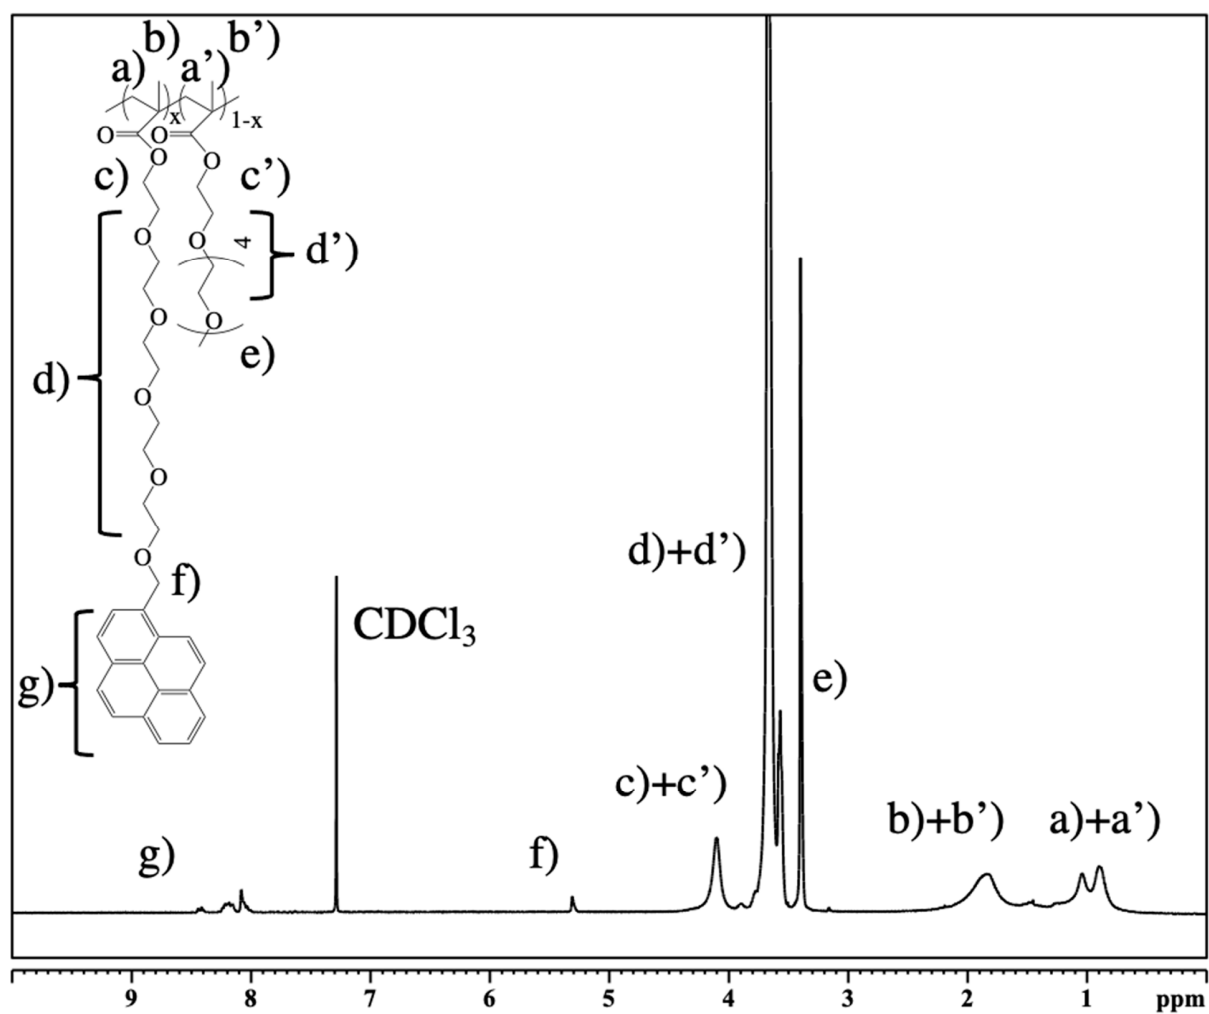

**Figure S4.**  $^1\text{H}$  NMR spectrum of  $\text{PyEG}_5(3.6)\text{-PEG}_5\text{MA}$ . ( $\text{CDCl}_3$ , 300 MHz).



### C] Gel permeation chromatography

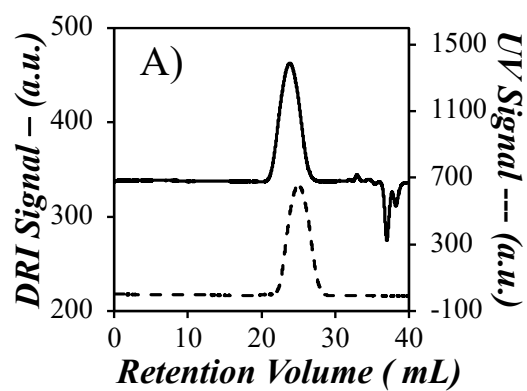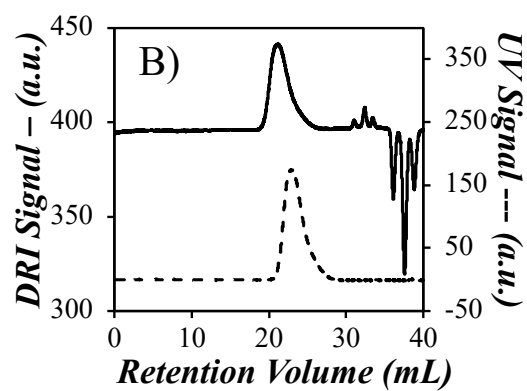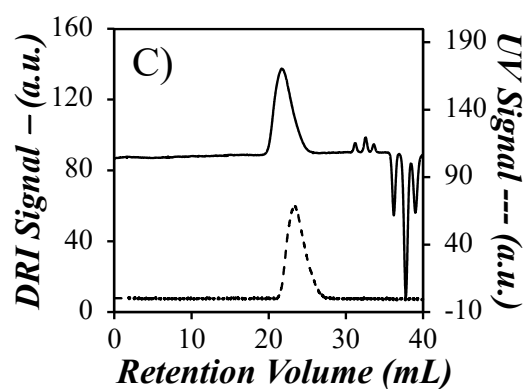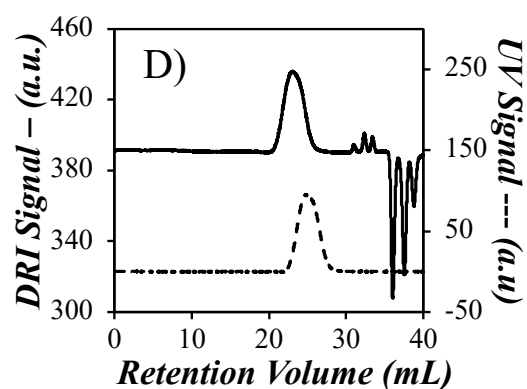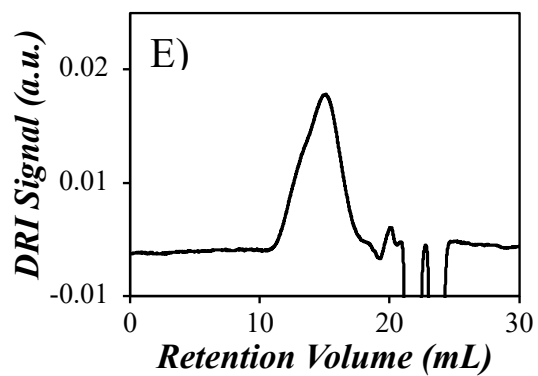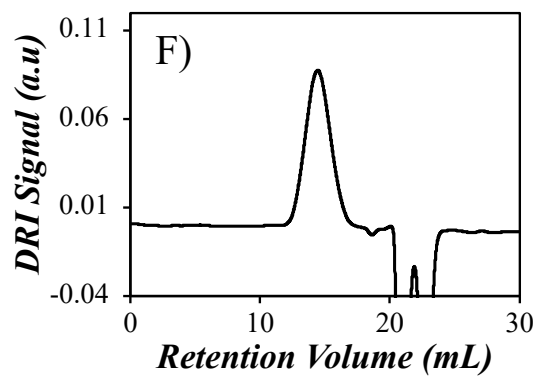

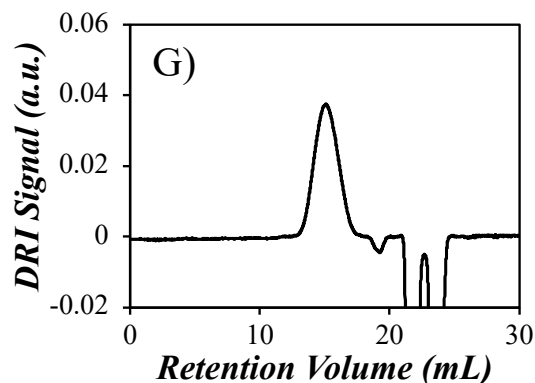

**Figure S5.** GPC traces in THF with ( — ) DRI and ( - - - - ) absorption detector for A) PyEG<sub>5</sub>(2.6)-PEG<sub>0</sub>MA, B) PyEG<sub>5</sub>(3.4)-PEG<sub>3</sub>MA, C) PyEG<sub>4</sub>(1.2)-PEG<sub>5</sub>MA and D) PyEG<sub>5</sub>(2.2)-PEG<sub>5</sub>MA. GPC traces in DMSO with DRI detector only for E) PyEG<sub>5</sub>(3.6%)-PEG<sub>7</sub>MA, F) PyEG<sub>5</sub>(5.2)-PEG<sub>9</sub>MA, and G) PyEG<sub>5</sub>(2.1)-PEG<sub>19</sub>MA. The number in parenthesis indicates the molar percentage of pyrene-labeled structural units.

All samples run in DMSO were first injected into a GPC instrument, that used *N,N*-dimethylformamide (DMF) with 0.1 wt% LiCl as eluent. The instrument was equipped with a DRI and UV detector. This was done to ensure that the polymers were free of any unreacted monomer or free pyrene derivative. Since the GPC system in DMF was not equipped with a light scattering detector, the polymers were re-injected into the DMSO GPC for absolute molecular weight determination.

## D] Steady-state fluorescence spectra

The SSF spectra for each PyEG<sub>5</sub>-PEG<sub>n</sub>MA PBB in degassed tetrahydrofuran (THF), acetonitrile, dimethylformamide (DMF), and dimethylsulfoxide (DMSO).

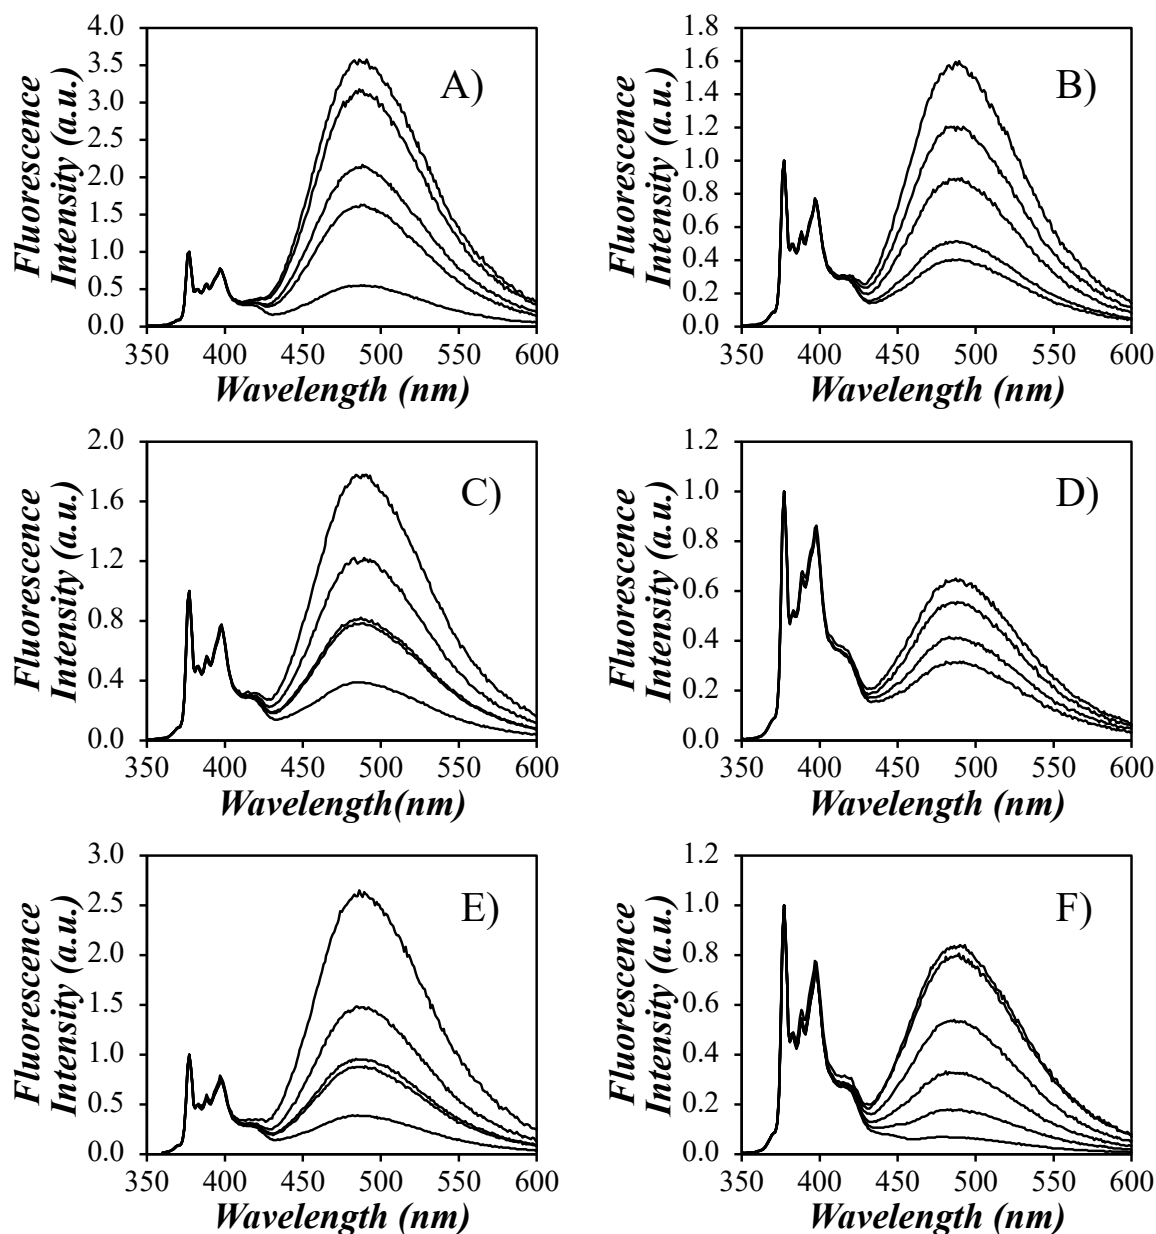

**Figure S6.** SSF spectra of A) PyEG<sub>5</sub>-PEG<sub>0</sub>MA, B) PyEG<sub>5</sub>-PEG<sub>3</sub>MA, C) PyEG<sub>5</sub>-PEG<sub>5</sub>MA, D) PyEG<sub>5</sub>-PEG<sub>7</sub>MA, E) PyEG<sub>5</sub>-PEG<sub>9</sub>MA, and F) PyEG<sub>5</sub>-PEG<sub>19</sub>MA in acetonitrile.  $\lambda_{\text{ex}}=344$  nm.

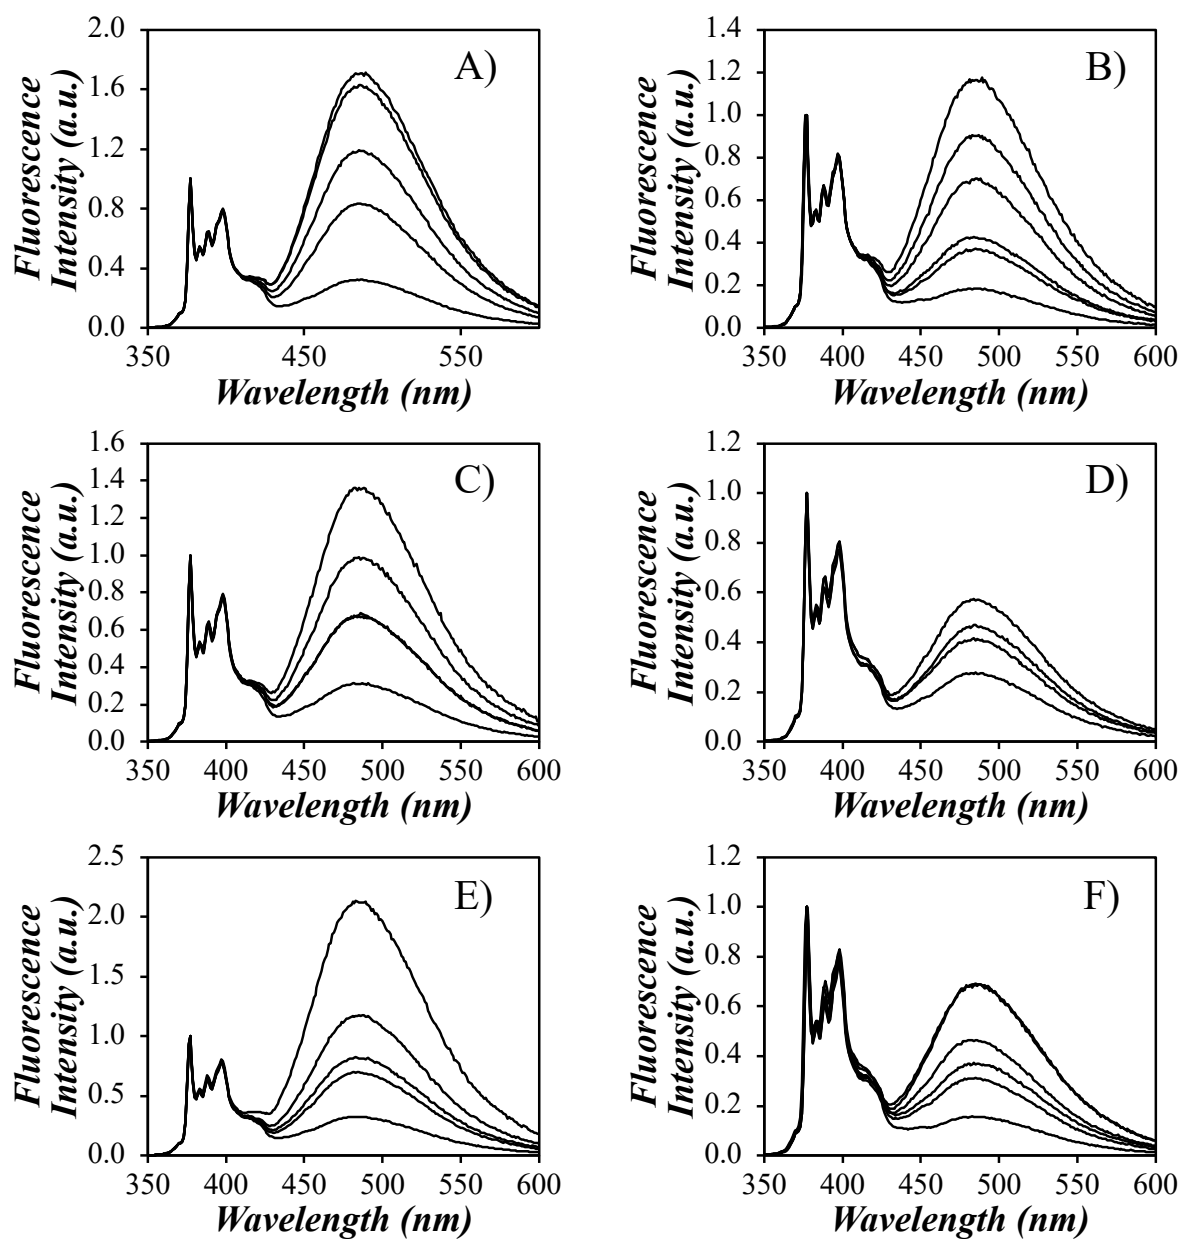

**Figure S7.** SSF spectra of A) PyEG<sub>5</sub>-PEG<sub>0</sub>MA, B) PyEG<sub>5</sub>-PEG<sub>3</sub>MA, C) PyEG<sub>5</sub>-PEG<sub>5</sub>MA, D) PyEG<sub>5</sub>-PEG<sub>7</sub>MA, E) PyEG<sub>5</sub>-PEG<sub>9</sub>MA, and F) PyEG<sub>5</sub>-PEG<sub>19</sub>MA in THF.  $\lambda_{\text{ex}}$ =344 nm.

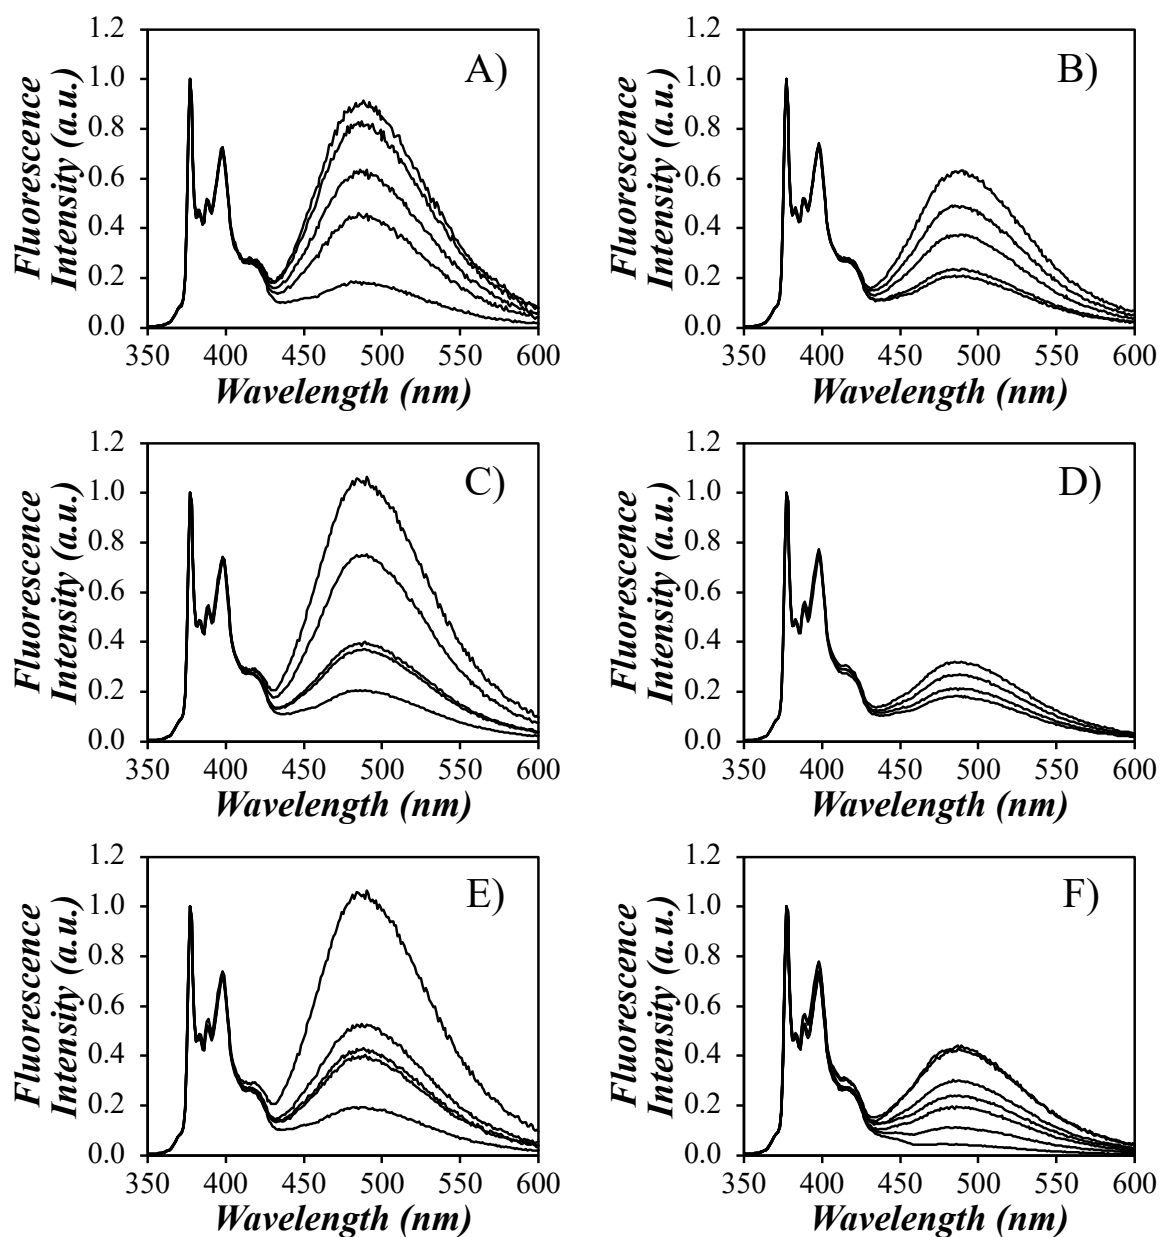

**Figure S8.** SSF spectra of A) PyEG<sub>5</sub>-PEG<sub>0</sub>MA, B) PyEG<sub>5</sub>-PEG<sub>3</sub>MA, C) PyEG<sub>5</sub>-PEG<sub>5</sub>MA, D) PyEG<sub>5</sub>-PEG<sub>7</sub>MA, E) PyEG<sub>5</sub>-PEG<sub>9</sub>MA, and F) PyEG<sub>5</sub>-PEG<sub>19</sub>MA in DMF.  $\lambda_{\text{ex}}=344$  nm.

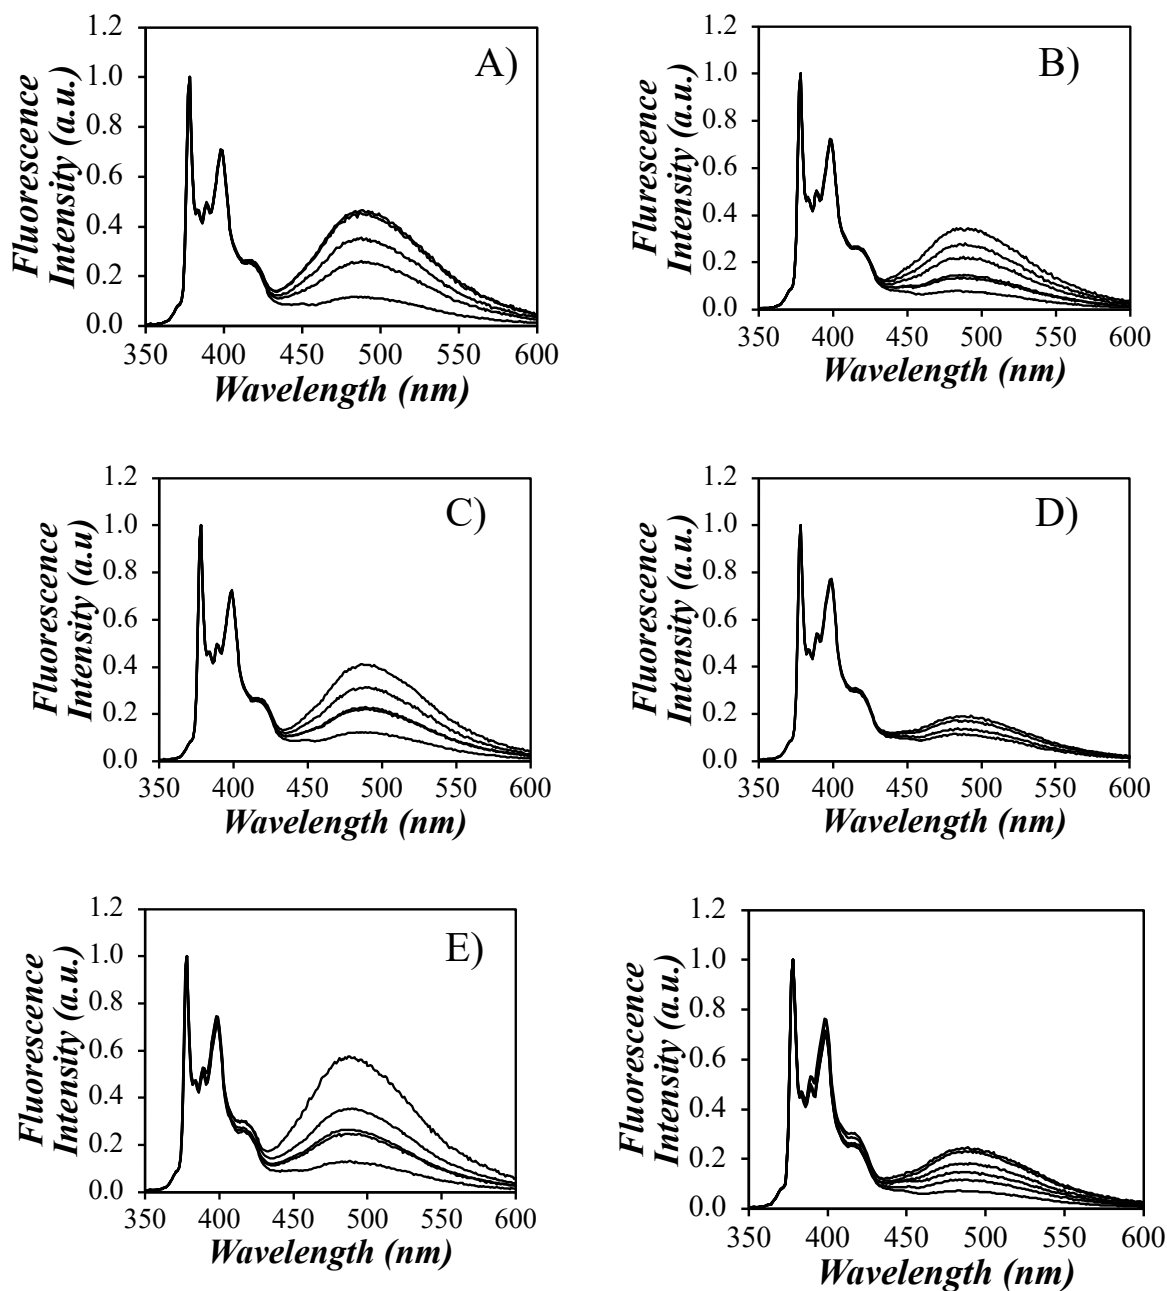

**Figure S9.** Steady-state fluorescence spectra of A) PyEG<sub>5</sub>-PEG<sub>0</sub>MA, B) PyEG<sub>5</sub>-PEG<sub>3</sub>MA, C) PyEG<sub>5</sub>-PEG<sub>5</sub>MA, D) PyEG<sub>5</sub>-PEG<sub>7</sub>MA, E) PyEG<sub>5</sub>-PEG<sub>9</sub>MA, and F) PyEG<sub>5</sub>-PEG<sub>19</sub>MA in DMSO.  $[Py] = 2.5 \times 10^{-6}$  M;  $\lambda_{ex} = 344$  nm.

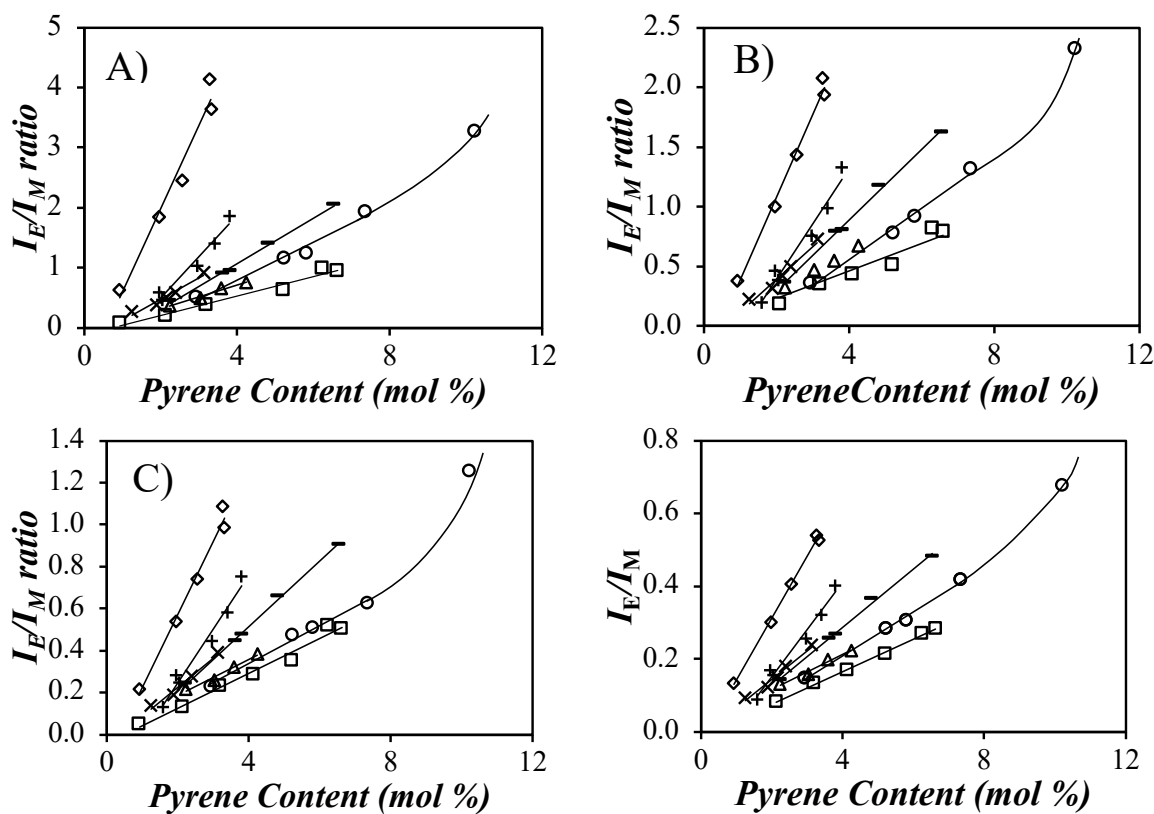

**Figure S10.** Plot of  $I_E/I_M$  ratio versus pyrene content for PyEG<sub>5</sub>-PEG<sub>n</sub>MA in A) acetonitrile, B) THF, C) DMF, and D) DMSO. ( $\diamond$ ) PyEG<sub>5</sub>-PEG<sub>0</sub>MA, (+) PyEG<sub>5</sub>-PEG<sub>3</sub>MA, ( $\times$ ) PyEG<sub>5</sub>-PEG<sub>4</sub>MA, (—) PyEG<sub>5</sub>-PEG<sub>5</sub>MA, ( $\Delta$ ) PyEG<sub>5</sub>-PEG<sub>7</sub>MA, ( $\circ$ ) PyEG<sub>5</sub>-PEG<sub>9</sub>MA, and ( $\square$ ) PyEG<sub>5</sub>-PEG<sub>19</sub>MA.

## E] Sample fit of the global FBM analysis of the fluorescence decays

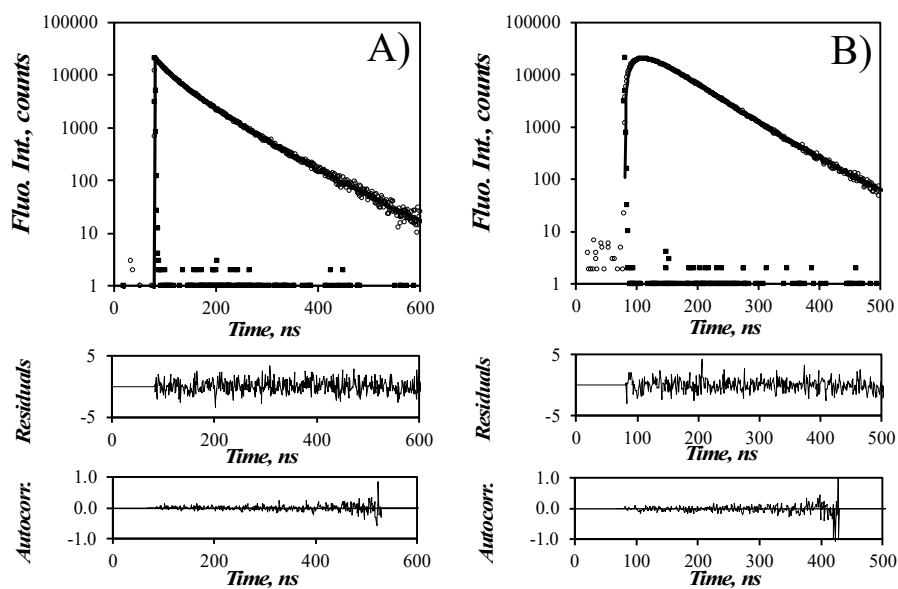

**Figure S11.** Global FBM analysis of the (A) monomer ( $\lambda_{\text{em}} = 375$  nm) and (B) excimer ( $\lambda_{\text{em}} = 510$  nm) fluorescence decays for PyEG<sub>5</sub>-PEG<sub>0</sub>MA with a pyrene content of 2.6 mol %.  $\chi^2 = 1.15$ ,  $\lambda_{\text{ex}} = 344$  nm.



## F] Parameters retrieved from the FBM analysis

**Table S1.** Parameters retrieved from the FBM analysis of the monomer decays for the PyEG<sub>5</sub>-PEG<sub>n</sub>MA samples in degassed acetonitrile.

| Sample                                                                                                                                                      | Mol% | $k_{\text{blob}}$<br>( $10^6\text{s}^{-1}$ ) | $\langle n \rangle$ | $k_{\text{c}}[\text{blob}]$<br>( $10^6\text{s}^{-1}$ ) | $f_{\text{Mdiff}}$ | $f_{\text{k2}}$ | $f_{\text{Mfree}}$ | $f_{\text{MS}}$ | $\chi^2$ |
|-------------------------------------------------------------------------------------------------------------------------------------------------------------|------|----------------------------------------------|---------------------|--------------------------------------------------------|--------------------|-----------------|--------------------|-----------------|----------|
| PyEG <sub>5</sub> -PEG <sub>0</sub> MA<br>$k_2 = 1.49 \times 10^8 \text{ s}^{-1}$<br>$\tau_{\text{M}} = 270 \text{ ns}$                                     | 0.9  | 11.4                                         | 1.39                | 4.34                                                   | 0.68               | 0.24            | 0.08               | -               | 1.0      |
|                                                                                                                                                             | 2.0  | 11.8                                         | 2.30                | 3.50                                                   | 0.57               | 0.42            | 0.02               | -               | 1.2      |
|                                                                                                                                                             | 2.6  | 12.0                                         | 2.70                | 3.65                                                   | 0.46               | 0.53            | 0.01               | -               | 1.1      |
|                                                                                                                                                             | 3.3  | 10.7                                         | 3.71                | 2.42                                                   | 0.37               | 0.62            | 0.00               | -               | 1.2      |
|                                                                                                                                                             | 3.3  | 10.8                                         | 3.47                | 2.37                                                   | 0.38               | 0.61            | 0.00               | -               | 1.1      |
| PyEG <sub>5</sub> -PEG <sub>3</sub> MA<br>$k_2 = 1.11 \times 10^8 \text{ s}^{-1}$<br>$\tau_{\text{M}} = 270 \text{ ns}$                                     | 2.0  | 12.2                                         | 1.28                | 4.33                                                   | 0.63               | 0.29            | 0.08               | -               | 1.0      |
|                                                                                                                                                             | 2.1  | 12.3                                         | 1.09                | 3.70                                                   | 0.65               | 0.24            | 0.11               | -               | 1.1      |
|                                                                                                                                                             | 3.0  | 10.3                                         | 1.78                | 3.12                                                   | 0.58               | 0.40            | 0.02               | -               | 1.1      |
|                                                                                                                                                             | 3.4  | 10.6                                         | 2.08                | 3.39                                                   | 0.51               | 0.48            | 0.02               | -               | 1.1      |
|                                                                                                                                                             | 3.8  | 10.0                                         | 2.54                | 2.29                                                   | 0.46               | 0.53            | 0.01               | -               | 1.0      |
| PyEG <sub>5</sub> -PEG <sub>4</sub> MA<br>$k_2 = 0.91 \times 10^8 \text{ s}^{-1}$<br>$\tau_{\text{M}} = 270 \text{ ns}$                                     | 1.2  | 10.5                                         | 0.89                | 3.30                                                   | 0.61               | 0.20            | 0.18               | -               | 1.2      |
|                                                                                                                                                             | 1.9  | 11.0                                         | 1.08                | 3.00                                                   | 0.64               | 0.24            | 0.12               | -               | 1.1      |
|                                                                                                                                                             | 2.2  | 9.2                                          | 1.30                | 2.59                                                   | 0.61               | 0.30            | 0.09               | -               | 1.0      |
|                                                                                                                                                             | 2.4  | 8.9                                          | 1.39                | 2.75                                                   | 0.59               | 0.33            | 0.07               | -               | 1.2      |
|                                                                                                                                                             | 3.1  | 9.0                                          | 1.76                | 2.78                                                   | 0.57               | 0.40            | 0.04               | -               | 1.0      |
| PyEG <sub>5</sub> -PEG <sub>5</sub> MA<br>$k_2 = 1.43 \times 10^8 \text{ s}^{-1}$<br>$\tau_{\text{M}} = 270 \text{ ns}$                                     | 2.2  | 13.4                                         | 1.15                | 4.60                                                   | 0.65               | 0.23            | 0.13               | -               | 1.1      |
|                                                                                                                                                             | 3.6  | 12.2                                         | 1.65                | 3.19                                                   | 0.63               | 0.34            | 0.03               | -               | 1.2      |
|                                                                                                                                                             | 3.8  | 13.1                                         | 1.62                | 3.64                                                   | 0.61               | 0.36            | 0.03               | -               | 1.1      |
|                                                                                                                                                             | 4.8  | 11.6                                         | 2.13                | 3.21                                                   | 0.56               | 0.43            | 0.02               | -               | 1.2      |
|                                                                                                                                                             | 6.5  | 11.9                                         | 2.47                | 2.94                                                   | 0.49               | 0.50            | 0.01               | -               | 1.1      |
| PyEG <sub>5</sub> -PEG <sub>7</sub> MA<br>$k_2 = 1.49 \times 10^8 \text{ s}^{-1}$<br>$\tau_{\text{M}} = 270 \text{ ns}$<br>$\tau_{\text{S}} = 4 \text{ ns}$ | 2.2  | 18.1                                         | 1.10                | 3.82                                                   | 0.43               | 0.16            | 0.09               | 0.33            | 1.2      |
|                                                                                                                                                             | 3.0  | 17.7                                         | 1.26                | 3.06                                                   | 0.42               | 0.21            | 0.04               | 0.33            | 1.1      |
|                                                                                                                                                             | 3.6  | 15.1                                         | 1.42                | 2.97                                                   | 0.44               | 0.23            | 0.04               | 0.30            | 1.2      |
|                                                                                                                                                             | 4.2  | 17.0                                         | 1.59                | 2.76                                                   | 0.43               | 0.28            | 0.03               | 0.26            | 1.2      |
| PyEG <sub>5</sub> -PEG <sub>9</sub> MA<br>$k_2 = 1.40 \times 10^8 \text{ s}^{-1}$<br>$\tau_{\text{M}} = 270 \text{ ns}$                                     | 2.9  | 12.3                                         | 1.31                | 2.88                                                   | 0.64               | 0.21            | 0.15               | -               | 1.1      |
|                                                                                                                                                             | 5.2  | 13.8                                         | 1.76                | 3.23                                                   | 0.61               | 0.35            | 0.04               | -               | 1.1      |
|                                                                                                                                                             | 5.8  | 14.2                                         | 1.82                | 3.16                                                   | 0.55               | 0.41            | 0.04               | -               | 1.2      |
|                                                                                                                                                             | 7.4  | 13.0                                         | 2.30                | 2.68                                                   | 0.51               | 0.48            | 0.02               | -               | 1.1      |
| PyEG <sub>5</sub> -PEG <sub>19</sub> MA<br>$k_2 = 1.33 \times 10^8 \text{ s}^{-1}$<br>$\tau_{\text{M}} = 270 \text{ ns}$                                    | 10.2 | 12.2                                         | 3.12                | 1.98                                                   | 0.36               | 0.63            | 0.01               | -               | 1.1      |
|                                                                                                                                                             | 2.1  | 13.8                                         | 1.24                | 2.97                                                   | 0.50               | 0.15            | 0.35               | -               | 1.1      |
|                                                                                                                                                             | 3.2  | 12.7                                         | 1.39                | 2.97                                                   | 0.59               | 0.22            | 0.19               | -               | 1.2      |
|                                                                                                                                                             | 5.2  | 13.9                                         | 1.76                | 2.71                                                   | 0.53               | 0.34            | 0.13               | -               | 1.1      |
|                                                                                                                                                             | 6.2  | 12.4                                         | 1.93                | 2.51                                                   | 0.57               | 0.38            | 0.06               | -               | 1.1      |
|                                                                                                                                                             | 6.6  | 14.6                                         | 2.01                | 2.26                                                   | 0.51               | 0.42            | 0.07               | -               | 1.1      |

**Table S2.** Parameters retrieved from the FBM analysis of the monomer decays for the PyEG<sub>5</sub>-PEG<sub>n</sub>MA samples in degassed THF.

| Sample                                                                                                                   | Mol% | $k_{\text{blob}}$<br>( $10^6\text{s}^{-1}$ ) | $\langle n \rangle$ | $k_{\text{e}}[\text{blob}]$<br>( $10^6\text{s}^{-1}$ ) | $f_{\text{Mdiff}}$ | $f_{\text{k2}}$ | $f_{\text{Mfree}}$ | $\chi^2$ |
|--------------------------------------------------------------------------------------------------------------------------|------|----------------------------------------------|---------------------|--------------------------------------------------------|--------------------|-----------------|--------------------|----------|
| PyEG <sub>5</sub> -PEG <sub>0</sub> MA<br>$k_2 = 1.02 \times 10^8 \text{ s}^{-1}$<br>$\tau_{\text{M}} = 270 \text{ ns}$  | 0.9  | 9.1                                          | 1.01                | 3.40                                                   | 0.71               | 0.14            | 0.15               | 1.2      |
|                                                                                                                          | 2.0  | 9.5                                          | 1.74                | 3.84                                                   | 0.69               | 0.27            | 0.04               | 1.1      |
|                                                                                                                          | 2.6  | 9.8                                          | 2.15                | 4.33                                                   | 0.63               | 0.35            | 0.02               | 1.1      |
|                                                                                                                          | 3.3  | 9.1                                          | 2.79                | 4.10                                                   | 0.57               | 0.43            | 0.00               | 1.1      |
|                                                                                                                          | 3.3  | 7.9                                          | 2.86                | 2.04                                                   | 0.58               | 0.41            | 0.00               | 1.2      |
| PyEG <sub>5</sub> -PEG <sub>3</sub> MA<br>$k_2 = 0.71 \times 10^8 \text{ s}^{-1}$<br>$\tau_{\text{M}} = 270 \text{ ns}$  | 2.0  | 7.8                                          | 1.17                | 3.88                                                   | 0.64               | 0.26            | 0.09               | 1.1      |
|                                                                                                                          | 2.1  | 7.5                                          | 1.00                | 3.47                                                   | 0.66               | 0.25            | 0.09               | 1.1      |
|                                                                                                                          | 3.0  | 6.8                                          | 1.66                | 3.06                                                   | 0.61               | 0.35            | 0.03               | 1.1      |
|                                                                                                                          | 3.4  | 6.5                                          | 2.01                | 2.74                                                   | 0.56               | 0.43            | 0.01               | 1.1      |
|                                                                                                                          | 3.8  | 6.2                                          | 2.47                | 2.89                                                   | 0.51               | 0.48            | 0.01               | 1.1      |
| PyEG <sub>5</sub> -PEG <sub>4</sub> MA<br>$k_2 = 0.68 \times 10^8 \text{ s}^{-1}$<br>$\tau_{\text{M}} = 270 \text{ ns}$  | 1.2  | 9.6                                          | 0.76                | 2.94                                                   | 0.63               | 0.16            | 0.21               | 1.2      |
|                                                                                                                          | 1.9  | 8.1                                          | 0.99                | 2.69                                                   | 0.65               | 0.21            | 0.21               | 1.1      |
|                                                                                                                          | 2.2  | 6.7                                          | 1.22                | 2.66                                                   | 0.65               | 0.23            | 0.12               | 1.1      |
|                                                                                                                          | 2.4  | 6.5                                          | 1.33                | 2.48                                                   | 0.65               | 0.26            | 0.09               | 1.0      |
|                                                                                                                          | 3.1  | 6.2                                          | 1.65                | 2.28                                                   | 0.60               | 0.36            | 0.04               | 1.1      |
| PyEG <sub>5</sub> -PEG <sub>5</sub> MA<br>$k_2 = 0.88 \times 10^8 \text{ s}^{-1}$<br>$\tau_{\text{M}} = 270 \text{ ns}$  | 2.2  | 9.2                                          | 1.05                | 3.80                                                   | 0.65               | 0.22            | 0.13               | 1.2      |
|                                                                                                                          | 3.6  | 8.3                                          | 1.57                | 3.26                                                   | 0.62               | 0.33            | 0.05               | 1.1      |
|                                                                                                                          | 3.8  | 8.7                                          | 1.53                | 3.22                                                   | 0.63               | 0.33            | 0.04               | 1.1      |
|                                                                                                                          | 4.8  | 7.9                                          | 2.01                | 3.25                                                   | 0.57               | 0.41            | 0.02               | 1.1      |
|                                                                                                                          | 6.5  | 7.7                                          | 2.43                | 2.81                                                   | 0.49               | 0.50            | 0.01               | 1.0      |
| PyEG <sub>5</sub> -PEG <sub>7</sub> MA<br>$k_2 = 0.80 \times 10^8 \text{ s}^{-1}$<br>$\tau_{\text{M}} = 270 \text{ ns}$  | 2.2  | 9.4                                          | 1.02                | 3.99                                                   | 0.58               | 0.23            | 0.20               | 1.1      |
|                                                                                                                          | 3.0  | 9.9                                          | 1.13                | 3.55                                                   | 0.61               | 0.29            | 0.10               | 1.1      |
|                                                                                                                          | 3.6  | 8.9                                          | 1.27                | 3.57                                                   | 0.62               | 0.30            | 0.08               | 1.1      |
|                                                                                                                          | 4.2  | 9.7                                          | 1.36                | 3.50                                                   | 0.57               | 0.37            | 0.06               | 1.1      |
| PyEG <sub>5</sub> -PEG <sub>9</sub> MA<br>$k_2 = 0.91 \times 10^8 \text{ s}^{-1}$<br>$\tau_{\text{M}} = 270 \text{ ns}$  | 2.9  | 10.1                                         | 1.12                | 3.64                                                   | 0.62               | 0.22            | 0.16               | 1.1      |
|                                                                                                                          | 5.2  | 8.9                                          | 1.67                | 2.90                                                   | 0.61               | 0.36            | 0.04               | 1.1      |
|                                                                                                                          | 5.8  | 9.0                                          | 1.83                | 2.81                                                   | 0.57               | 0.40            | 0.03               | 1.1      |
|                                                                                                                          | 7.4  | 8.6                                          | 2.21                | 2.78                                                   | 0.53               | 0.46            | 0.02               | 1.1      |
|                                                                                                                          | 10.2 | 7.4                                          | 3.31                | 2.86                                                   | 0.40               | 0.60            | 0.00               | 1.1      |
| PyEG <sub>5</sub> -PEG <sub>19</sub> MA<br>$k_2 = 0.86 \times 10^8 \text{ s}^{-1}$<br>$\tau_{\text{M}} = 270 \text{ ns}$ | 2.1  | 10.7                                         | 1.03                | 4.73                                                   | 0.48               | 0.15            | 0.37               | 1.2      |
|                                                                                                                          | 3.2  | 11.3                                         | 1.13                | 3.84                                                   | 0.59               | 0.24            | 0.17               | 1.2      |
|                                                                                                                          | 4.4  | 8.8                                          | 1.44                | 3.96                                                   | 0.60               | 0.23            | 0.16               | 1.1      |
|                                                                                                                          | 5.2  | 10.4                                         | 1.53                | 3.42                                                   | 0.53               | 0.33            | 0.13               | 1.2      |
|                                                                                                                          | 6.2  | 8.3                                          | 1.83                | 2.48                                                   | 0.60               | 0.35            | 0.05               | 1.2      |
|                                                                                                                          | 6.6  | 10.0                                         | 1.77                | 2.69                                                   | 0.53               | 0.41            | 0.06               | 1.2      |

**Table S3.** Parameters retrieved from the FBM analysis of the monomer decays for the PyEG<sub>5</sub>-PEG<sub>n</sub>MA samples in degassed DMF.

| Sample                                                                                                                   | Mol% | $k_{\text{blob}}$<br>( $10^6\text{s}^{-1}$ ) | $\langle n \rangle$ | $k_{\text{e}}[\text{blob}]$<br>( $10^6\text{s}^{-1}$ ) | $f_{\text{Mdiff}}$ | $f_{\text{k2}}$ | $f_{\text{Mfree}}$ | $\chi^2$ |
|--------------------------------------------------------------------------------------------------------------------------|------|----------------------------------------------|---------------------|--------------------------------------------------------|--------------------|-----------------|--------------------|----------|
| PyEG <sub>5</sub> -PEG <sub>0</sub> MA<br>$k_2 = 0.80 \times 10^8 \text{ s}^{-1}$<br>$\tau_{\text{M}} = 230 \text{ ns}$  | 0.9  | 9.3                                          | 0.87                | 4.64                                                   | 0.69               | 0.08            | 0.17               | 1.1      |
|                                                                                                                          | 2.0  | 8.3                                          | 1.59                | 3.99                                                   | 0.70               | 0.08            | 0.04               | 1.1      |
|                                                                                                                          | 2.6  | 7.2                                          | 2.14                | 3.13                                                   | 0.65               | 0.08            | 0.02               | 1.1      |
|                                                                                                                          | 3.3  | 6.9                                          | 2.76                | 2.20                                                   | 0.59               | 0.08            | 0.00               | 1.1      |
|                                                                                                                          | 3.3  | 7.1                                          | 2.59                | 2.67                                                   | 0.60               | 0.08            | 0.01               | 1.1      |
| PyEG <sub>5</sub> -PEG <sub>3</sub> MA<br>$k_2 = 0.73 \times 10^8 \text{ s}^{-1}$<br>$\tau_{\text{M}} = 230 \text{ ns}$  | 2.0  | 6.9                                          | 1.15                | 3.34                                                   | 0.68               | 0.19            | 0.13               | 1.2      |
|                                                                                                                          | 2.1  | 7.7                                          | 0.91                | 4.16                                                   | 0.60               | 0.20            | 0.20               | 1.2      |
|                                                                                                                          | 3.0  | 6.7                                          | 1.48                | 3.67                                                   | 0.68               | 0.26            | 0.06               | 1.1      |
|                                                                                                                          | 3.4  | 6.8                                          | 1.74                | 3.03                                                   | 0.65               | 0.31            | 0.03               | 1.1      |
|                                                                                                                          | 3.8  | 6.2                                          | 2.10                | 2.83                                                   | 0.62               | 0.37            | 0.01               | 1.1      |
| PyEG <sub>5</sub> -PEG <sub>4</sub> MA<br>$k_2 = 0.62 \times 10^8 \text{ s}^{-1}$<br>$\tau_{\text{M}} = 230 \text{ ns}$  | 1.2  | 7.3                                          | 0.81                | 3.24                                                   | 0.60               | 0.14            | 0.26               | 1.1      |
|                                                                                                                          | 1.9  | 7.9                                          | 0.87                | 3.75                                                   | 0.62               | 0.18            | 0.20               | 1.1      |
|                                                                                                                          | 2.2  | 6.3                                          | 1.10                | 2.52                                                   | 0.68               | 0.17            | 0.14               | 1.1      |
|                                                                                                                          | 2.4  | 6.2                                          | 1.18                | 2.67                                                   | 0.67               | 0.21            | 0.12               | 1.1      |
|                                                                                                                          | 3.1  | 6.1                                          | 1.46                | 2.53                                                   | 0.66               | 0.28            | 0.06               | 1.1      |
| PyEG <sub>5</sub> -PEG <sub>5</sub> MA<br>$k_2 = 0.69 \times 10^8 \text{ s}^{-1}$<br>$\tau_{\text{M}} = 230 \text{ ns}$  | 2.2  | 7.2                                          | 1.09                | 3.38                                                   | 0.64               | 0.21            | 0.15               | 1.0      |
|                                                                                                                          | 3.6  | 6.8                                          | 1.48                | 2.78                                                   | 0.63               | 0.31            | 0.06               | 1.0      |
|                                                                                                                          | 3.8  | 6.9                                          | 1.51                | 3.32                                                   | 0.63               | 0.31            | 0.05               | 1.0      |
|                                                                                                                          | 4.8  | 6.3                                          | 1.96                | 2.51                                                   | 0.58               | 0.39            | 0.03               | 1.1      |
|                                                                                                                          | 6.5  | 5.3                                          | 2.53                | 1.43                                                   | 0.51               | 0.48            | 0.01               | 1.2      |
| PyEG <sub>5</sub> -PEG <sub>7</sub> MA<br>$k_2 = 0.58 \times 10^8 \text{ s}^{-1}$<br>$\tau_{\text{M}} = 230 \text{ ns}$  | 2.2  | 10.3                                         | 0.87                | 4.56                                                   | 0.58               | 0.20            | 0.21               | 1.1      |
|                                                                                                                          | 3.0  | 8.8                                          | 0.97                | 4.84                                                   | 0.55               | 0.30            | 0.15               | 1.1      |
|                                                                                                                          | 3.6  | 7.6                                          | 1.14                | 3.37                                                   | 0.60               | 0.31            | 0.09               | 1.2      |
|                                                                                                                          | 4.2  | 8.1                                          | 1.22                | 3.87                                                   | 0.54               | 0.39            | 0.08               | 1.1      |
| PyEG <sub>5</sub> -PEG <sub>9</sub> MA<br>$k_2 = 1.03 \times 10^8 \text{ s}^{-1}$<br>$\tau_{\text{M}} = 230 \text{ ns}$  | 2.9  | 10.30                                        | 0.97                | 4.76                                                   | 0.68               | 0.14            | 0.18               | 1.0      |
|                                                                                                                          | 5.2  | 10.12                                        | 1.34                | 3.91                                                   | 0.71               | 0.23            | 0.06               | 1.1      |
|                                                                                                                          | 5.8  | 11.52                                        | 1.37                | 3.96                                                   | 0.69               | 0.25            | 0.06               | 1.1      |
|                                                                                                                          | 7.4  | 10.57                                        | 1.71                | 3.81                                                   | 0.64               | 0.29            | 0.07               | 1.1      |
|                                                                                                                          | 10.2 | 9.22                                         | 2.55                | 3.27                                                   | 0.56               | 0.43            | 0.01               | 1.2      |
| PyEG <sub>5</sub> -PEG <sub>19</sub> MA<br>$k_2 = 0.83 \times 10^8 \text{ s}^{-1}$<br>$\tau_{\text{M}} = 230 \text{ ns}$ | 2.1  | 11.6                                         | 0.87                | 4.64                                                   | 0.47               | 0.12            | 0.40               | 1.1      |
|                                                                                                                          | 3.2  | 10.0                                         | 1.05                | 4.14                                                   | 0.60               | 0.18            | 0.23               | 1.1      |
|                                                                                                                          | 4.4  | 11.5                                         | 1.15                | 3.72                                                   | 0.61               | 0.23            | 0.16               | 1.2      |
|                                                                                                                          | 5.2  | 10.4                                         | 1.35                | 3.70                                                   | 0.57               | 0.26            | 0.16               | 1.1      |
|                                                                                                                          | 6.2  | 8.0                                          | 1.70                | 3.17                                                   | 0.64               | 0.28            | 0.07               | 1.0      |
|                                                                                                                          | 6.6  | 11.5                                         | 1.45                | 3.06                                                   | 0.57               | 0.36            | 0.07               | 1.2      |

**Table S4.** Parameters retrieved from the FBM analysis of the monomer decays for the PyEG<sub>5</sub>-PEG<sub>n</sub>MA samples in aerated DMSO.

| Sample                                                                                                                                                      | Mol% | $k_{\text{blob}}$<br>( $10^6\text{s}^{-1}$ ) | $\langle n \rangle$ | $k_{\text{e}}[\text{blob}]$<br>( $10^6\text{s}^{-1}$ ) | $f_{\text{Mdiff}}$ | $f_{\text{k2}}$ | $f_{\text{Mfree}}$ | $f_{\text{MS}}$ | $\chi^2$ |
|-------------------------------------------------------------------------------------------------------------------------------------------------------------|------|----------------------------------------------|---------------------|--------------------------------------------------------|--------------------|-----------------|--------------------|-----------------|----------|
| PyEG <sub>5</sub> -PEG <sub>0</sub> MA<br>$k_2 = 1.43 \times 10^8 \text{ s}^{-1}$<br>$\tau_{\text{M}} = 120 \text{ ns}$                                     | 0.9  | 9.4                                          | 0.81                | 6.91                                                   | 0.74               | 0.07            | 0.19               | -               | 1.1      |
|                                                                                                                                                             | 2.0  | 8.6                                          | 1.38                | 5.73                                                   | 0.82               | 0.13            | 0.05               | -               | 1.1      |
|                                                                                                                                                             | 2.6  | 9.2                                          | 1.63                | 6.18                                                   | 0.80               | 0.16            | 0.03               | -               | 1.2      |
|                                                                                                                                                             | 3.3  | 8.2                                          | 2.08                | 4.68                                                   | 0.79               | 0.20            | 0.01               | -               | 1.1      |
|                                                                                                                                                             | 3.3  | 10.0                                         | 1.74                | 4.93                                                   | 0.76               | 0.21            | 0.02               | -               | 1.2      |
| PyEG <sub>5</sub> -PEG <sub>3</sub> MA<br>$k_2 = 0.87 \times 10^8 \text{ s}^{-1}$<br>$\tau_{\text{M}} = 120 \text{ ns}$                                     | 1.6  | 9.7                                          | 0.69                | 8.16                                                   | 0.69               | 0.08            | 0.25               | -               | 1.2      |
|                                                                                                                                                             | 2.0  | 7.1                                          | 1.06                | 6.01                                                   | 0.77               | 0.14            | 0.09               | -               | 1.1      |
|                                                                                                                                                             | 3.0  | 7.5                                          | 1.30                | 6.15                                                   | 0.76               | 0.17            | 0.06               | -               | 1.1      |
|                                                                                                                                                             | 3.4  | 7.9                                          | 1.49                | 6.51                                                   | 0.74               | 0.21            | 0.05               | -               | 1.1      |
|                                                                                                                                                             | 3.8  | 7.1                                          | 1.81                | 5.33                                                   | 0.73               | 0.24            | 0.03               | -               | 1.0      |
| PyEG <sub>5</sub> -PEG <sub>4</sub> MA<br>$k_2 = 0.83 \times 10^8 \text{ s}^{-1}$<br>$\tau_{\text{M}} = 120 \text{ ns}$                                     | 1.2  | 8.1                                          | 0.73                | 7.07                                                   | 0.69               | 0.08            | 0.22               | -               | 1.1      |
|                                                                                                                                                             | 1.9  | 8.1                                          | 0.84                | 6.64                                                   | 0.70               | 0.10            | 0.20               | -               | 1.1      |
|                                                                                                                                                             | 2.2  | 7.5                                          | 0.98                | 7.22                                                   | 0.70               | 0.10            | 0.20               | -               | 1.1      |
|                                                                                                                                                             | 2.4  | 6.9                                          | 1.06                | 5.47                                                   | 0.75               | 0.13            | 0.12               | -               | 1.2      |
|                                                                                                                                                             | 3.1  | 8.4                                          | 1.17                | 7.88                                                   | 0.74               | 0.16            | 0.10               | -               | 1.1      |
| PyEG <sub>5</sub> -PEG <sub>5</sub> MA<br>$k_2 = 0.76 \times 10^8 \text{ s}^{-1}$<br>$\tau_{\text{M}} = 120 \text{ ns}$                                     | 2.2  | 8.3                                          | 0.85                | 5.62                                                   | 0.68               | 0.13            | 0.19               | -               | 1.1      |
|                                                                                                                                                             | 3.6  | 8.9                                          | 1.01                | 5.18                                                   | 0.73               | 0.18            | 0.09               | -               | 1.1      |
|                                                                                                                                                             | 3.8  | 8.0                                          | 1.13                | 4.89                                                   | 0.73               | 0.20            | 0.07               | -               | 1.1      |
|                                                                                                                                                             | 4.8  | 7.8                                          | 1.38                | 4.16                                                   | 0.74               | 0.24            | 0.02               | -               | 1.1      |
|                                                                                                                                                             | 6.5  | 7.3                                          | 1.72                | 4.62                                                   | 0.68               | 0.29            | 0.03               | -               | 1.2      |
| PyEG <sub>5</sub> -PEG <sub>7</sub> MA<br>$k_2 = 0.83 \times 10^8 \text{ s}^{-1}$<br>$\tau_{\text{M}} = 120 \text{ ns}$<br>$\tau_{\text{S}} = 4 \text{ ns}$ | 2.2  | 13.6                                         | 0.72                | 5.48                                                   | 0.35               | 0.09            | 0.08               | 0.48            | 1.0      |
|                                                                                                                                                             | 3.0  | 12.9                                         | 0.77                | 5.22                                                   | 0.38               | 0.11            | 0.06               | 0.46            | 1.0      |
|                                                                                                                                                             | 3.6  | 9.9                                          | 1.00                | 5.90                                                   | 0.49               | 0.13            | 0.07               | 0.31            | 1.1      |
|                                                                                                                                                             | 4.2  | 12.1                                         | 0.96                | 5.88                                                   | 0.41               | 0.13            | 0.04               | 0.41            | 1.1      |
| PyEG <sub>5</sub> -PEG <sub>9</sub> MA<br>$k_2 = 1.05 \times 10^8 \text{ s}^{-1}$<br>$\tau_{\text{M}} = 120 \text{ ns}$                                     | 2.9  | 11.1                                         | 0.78                | 6.53                                                   | 0.67               | 0.10            | 0.23               | -               | 1.1      |
|                                                                                                                                                             | 5.2  | 9.4                                          | 1.20                | 5.20                                                   | 0.75               | 0.17            | 0.08               | -               | 1.1      |
|                                                                                                                                                             | 5.8  | 9.7                                          | 1.26                | 5.25                                                   | 0.75               | 0.18            | 0.07               | -               | 1.1      |
|                                                                                                                                                             | 7.4  | 9.3                                          | 1.53                | 4.98                                                   | 0.75               | 0.22            | 0.02               | -               | 1.1      |
| PyEG <sub>5</sub> -PEG <sub>19</sub> MA<br>$k_2 = 1.09 \times 10^8 \text{ s}^{-1}$<br>$\tau_{\text{M}} = 120 \text{ ns}$                                    | 10.2 | 9.2                                          | 2.02                | 3.93                                                   | 0.69               | 0.31            | 0.00               | -               | 1.2      |
|                                                                                                                                                             | 2.1  | 17.5                                         | 0.54                | 3.71                                                   | 0.45               | 0.07            | 0.48               | -               | 1.0      |
|                                                                                                                                                             | 3.2  | 15.5                                         | 0.65                | 4.11                                                   | 0.55               | 0.09            | 0.36               | -               | 1.1      |
|                                                                                                                                                             | 5.2  | 12.6                                         | 0.99                | 4.48                                                   | 0.67               | 0.15            | 0.18               | -               | 1.0      |
|                                                                                                                                                             | 6.2  | 9.0                                          | 1.18                | 4.74                                                   | 0.71               | 0.14            | 0.14               | -               | 1.2      |
|                                                                                                                                                             | 6.6  | 13.5                                         | 0.95                | 3.62                                                   | 0.78               | 0.20            | 0.03               | -               | 1.2      |

**Table S5.** Parameters retrieved from the FBM analysis of the excimer decays for the PyEG<sub>5</sub>-PEG<sub>n</sub>MA samples in degassed acetonitrile.

| Sample                                                    | Mol % | $f_{EK2}$ | $\tau_{E0}$<br>(ns) | $f_{EdiffE0}$ | $f_{EE0}$ | $\tau_D$<br>(ns) | $f_{EdiffD}$ | $f_{ED}$ | $f_{ES}$ | $\chi^2$ |
|-----------------------------------------------------------|-------|-----------|---------------------|---------------|-----------|------------------|--------------|----------|----------|----------|
| PyEG <sub>5</sub> -PEG <sub>0</sub> MA                    | 0.9   | 0.25      | 49                  | 0.47          | 0.00      | 59               | 0.24         | 0.03     | -        | 1.0      |
|                                                           | 2.0   | 0.39      | 47                  | 0.23          | 0.00      | 55               | 0.31         | 0.08     | -        | 1.2      |
|                                                           | 2.6   | 0.49      | 47                  | 0.21          | 0.00      | 52               | 0.22         | 0.08     | -        | 1.1      |
|                                                           | 3.3   | 0.55      | 46                  | 0.15          | 0.00      | 54               | 0.18         | 0.12     | -        | 1.2      |
|                                                           | 3.3   | 0.55      | 46                  | 0.18          | 0.01      | 54               | 0.17         | 0.09     | -        | 1.1      |
| PyEG <sub>5</sub> -PEG <sub>3</sub> MA                    | 2.0   | 0.29      | 34                  | 0.00          | 0.07      | 53               | 0.64         | 0.00     | -        | 1.0      |
|                                                           | 2.1   | 0.31      | 47                  | 0.29          | 0.17      | 66               | 0.31         | 0.01     | -        | 1.1      |
|                                                           | 3.0   | 0.38      | 46                  | 0.25          | 0.00      | 54               | 0.31         | 0.06     | -        | 1.1      |
|                                                           | 3.4   | 0.44      | 50                  | 0.39          | 0.00      | 54               | 0.08         | 0.08     | -        | 1.1      |
|                                                           | 3.8   | 0.48      | 46                  | 0.29          | 0.00      | 55               | 0.13         | 0.11     | -        | 1.0      |
| PyEG <sub>5</sub> -PEG <sub>4</sub> MA                    | 1.2   | 0.24      | 27                  | 0.04          | 0.03      | 55               | 0.69         | 0.00     | -        | 1.2      |
|                                                           | 1.9   | 0.27      | 27                  | 0.14          | 0.03      | 56               | 0.56         | 0.00     | -        | 1.1      |
|                                                           | 2.2   | 0.32      | 25                  | 0.01          | 0.04      | 61               | 0.64         | 0.00     |          | 1.0      |
|                                                           | 2.4   | 0.34      | 48                  | 0.35          | 0.05      | 56               | 0.26         | 0.00     | -        | 1.2      |
|                                                           | 3.1   | 0.39      | 46                  | 0.49          | 0.01      | 70               | 0.06         | 0.05     | -        | 1.0      |
| PyEG <sub>5</sub> -PEG <sub>5</sub> MA                    | 2.2   | 0.25      | 53                  | 0.72          | 0.03      | -                | -            | -        | -        | 1.1      |
|                                                           | 3.2   | 0.56      | 53                  | 0.61          | 0.05      | -                | -            | -        | -        | 1.2      |
|                                                           | 3.6   | 0.35      | 54                  | 0.60          | 0.05      | -                | -            | -        | -        | 1.1      |
|                                                           | 4.8   | 0.41      | 52                  | 0.53          | 0.06      | -                | -            | -        | -        | 1.2      |
|                                                           | 6.5   | 0.46      | 52                  | 0.46          | 0.08      | -                | -            | -        | -        | 1.1      |
| PyEG <sub>5</sub> -PEG <sub>7</sub> MA<br>$\tau_s = 4$ ns | 2.2   | 0.25      | 26                  | 0.02          | 0.05      | 59               | 0.68         | 0.00     | 0.00     | 1.2      |
|                                                           | 3.0   | 0.32      | 49                  | 0.29          | 0.04      | 68               | 0.34         | 0.00     | 0.01     | 1.1      |
|                                                           | 3.6   | 0.32      | 43                  | 0.27          | 0.02      | 63               | 0.36         | 0.00     | 0.03     | 1.2      |
|                                                           | 4.2   | 0.36      | 48                  | 0.33          | 0.05      | 67               | 0.23         | 0.00     | 0.02     | 1.2      |
| PyEG <sub>5</sub> -PEG <sub>9</sub> MA                    | 2.9   | 0.24      | 42                  | 0.48          | 0.00      | 66               | 0.25         | 0.03     | -        | 1.1      |
|                                                           | 5.2   | 0.35      | 44                  | 0.24          | 0.00      | 55               | 0.36         | 0.06     | -        | 1.1      |
|                                                           | 5.8   | 0.40      | 49                  | 0.33          | 0.00      | 55               | 0.21         | 0.05     |          | 1.2      |
|                                                           | 7.4   | 0.45      | 45                  | 0.26          | 0.00      | 55               | 0.21         | 0.08     | -        | 1.1      |
|                                                           | 10.2  | 0.57      | 45                  | 0.15          | 0.10      | 54               | 0.18         | 0.00     | -        | 1.1      |
| PyEG <sub>5</sub> -PEG <sub>19</sub> MA                   | 2.1   | 0.22      | 44                  | 0.42          | 0.00      | 67               | 0.32         | 0.03     | -        | 1.1      |
|                                                           | 3.2   | 0.27      | 47                  | 0.51          | 0.00      | 64               | 0.19         | 0.04     | -        | 1.2      |
|                                                           | 5.2   | 0.37      | 41                  | 0.11          | 0.00      | 54               | 0.47         | 0.05     | -        | 1.1      |
|                                                           | 6.2   | 0.38      | 43                  | 0.22          | 0.00      | 54               | 0.35         | 0.05     | -        | 1.1      |
|                                                           | 6.6   | 0.42      | 46                  | 0.33          | 0.03      | 62               | 0.18         | 0.04     | -        | 1.1      |

**Table S6.** Parameters retrieved from the FBM analysis of the excimer decays for the PyEG<sub>5</sub>-PEG<sub>n</sub>MA samples in degassed THF.

| Sample                                  | Mol % | $f_{\text{Ek2}}$ | $\tau_{\text{E0}}$<br>(ns) | $f_{\text{EdiffE0}}$ | $f_{\text{EE0}}$ | $\tau_{\text{D}}$<br>(ns) | $f_{\text{EdiffD}}$ | $f_{\text{ED}}$ | $\chi^2$ |
|-----------------------------------------|-------|------------------|----------------------------|----------------------|------------------|---------------------------|---------------------|-----------------|----------|
| PyEG <sub>5</sub> -PEG <sub>0</sub> MA  | 0.9   | 0.17             | 56                         | 0.82                 | 0.01             | -                         | -                   | -               | 1.2      |
|                                         | 2.0   | 0.28             | 53                         | 0.71                 | 0.01             | -                         | -                   | -               | 1.1      |
|                                         | 2.6   | 0.35             | 52                         | 0.63                 | 0.02             | -                         | -                   | -               | 1.1      |
|                                         | 3.3   | 0.42             | 51                         | 0.56                 | 0.02             | -                         | -                   | -               | 1.1      |
|                                         | 3.3   | 0.41             | 51                         | 0.57                 | 0.02             | -                         | -                   | -               | 1.2      |
| PyEG <sub>5</sub> -PEG <sub>3</sub> MA  | 2.0   | 0.27             | 52                         | 0.53                 | 0.04             | 70                        | 0.13                | 0.03            | 1.1      |
|                                         | 2.1   | 0.23             | 55                         | 0.52                 | 0.17             | 83                        | 0.07                | 0.02            | 1.1      |
|                                         | 3.0   | 0.34             | 48                         | 0.32                 | 0.00             | 59                        | 0.28                | 0.06            | 1.1      |
|                                         | 3.4   | 0.41             | 52                         | 0.33                 | 0.00             | 55                        | 0.20                | 0.06            | 1.1      |
|                                         | 3.8   | 0.45             | 49                         | 0.33                 | 0.00             | 57                        | 0.14                | 0.09            | 1.1      |
| PyEG <sub>5</sub> -PEG <sub>4</sub> MA  | 1.2   | 0.20             | 42                         | 0.41                 | 0.04             | 73                        | 0.35                | 0.00            | 1.2      |
|                                         | 1.9   | 0.24             | 51                         | 0.61                 | 0.04             | 90                        | 0.11                | 0.00            | 1.1      |
|                                         | 2.2   | 0.26             | 42                         | 0.47                 | 0.01             | 65                        | 0.26                | 0.01            | 1.1      |
|                                         | 2.4   | 0.27             | 44                         | 0.45                 | 0.05             | 66                        | 0.22                | 0.01            | 1.0      |
|                                         | 3.1   | 0.37             | 46                         | 0.37                 | 0.01             | 60                        | 0.25                | 0.01            | 1.1      |
| PyEG <sub>5</sub> -PEG <sub>5</sub> MA  | 2.2   | 0.25             | 47                         | 0.42                 | 0.00             | 64                        | 0.32                | 0.02            | 1.2      |
|                                         | 3.2   | 0.34             | 49                         | 0.51                 | 0.00             | 68                        | 0.12                | 0.03            | 1.1      |
|                                         | 3.6   | 0.34             | 47                         | 0.42                 | 0.00             | 62                        | 0.22                | 0.03            | 1.1      |
|                                         | 4.8   | 0.41             | 34                         | 0.02                 | 0.03             | 52                        | 0.54                | 0.00            | 1.1      |
|                                         | 6.5   | 0.48             | 50                         | 0.32                 | 0.05             | 54                        | 0.16                | 0.00            | 1.0      |
| PyEG <sub>5</sub> -PEG <sub>7</sub> MA  | 2.2   | 0.27             | 49                         | 0.47                 | 0.02             | 67                        | 0.23                | 0.02            | 1.1      |
|                                         | 3.0   | 0.31             | 51                         | 0.53                 | 0.00             | 78                        | 0.13                | 0.00            | 1.1      |
|                                         | 3.6   | 0.32             | 51                         | 0.58                 | 0.01             | 74                        | 0.07                | 0.01            | 1.1      |
|                                         | 4.2   | 0.38             | 54                         | 0.54                 | 0.02             | 80                        | 0.04                | 0.02            | 1.1      |
| PyEG <sub>5</sub> -PEG <sub>9</sub> MA  | 2.9   | 0.25             | 51                         | 0.57                 | 0.00             | 75                        | 0.15                | 0.03            | 1.1      |
|                                         | 5.2   | 0.36             | 49                         | 0.42                 | 0.00             | 61                        | 0.20                | 0.03            | 1.1      |
|                                         | 5.8   | 0.41             | 50                         | 0.50                 | 0.00             | 69                        | 0.08                | 0.01            | 1.1      |
|                                         | 7.4   | 0.44             | 51                         | 0.50                 | 0.00             | 70                        | 0.01                | 0.05            | 1.1      |
|                                         | 10.2  | 0.55             | 48                         | 0.27                 | 0.00             | 55                        | 0.10                | 0.08            | 1.1      |
| PyEG <sub>5</sub> -PEG <sub>19</sub> MA | 2.1   | 0.23             | 58                         | 0.75                 | 0.02             | -                         | -                   | -               | 1.2      |
|                                         | 3.2   | 0.27             | 59                         | 0.69                 | 0.04             | -                         | -                   | -               | 1.2      |
|                                         | 4.4   | 0.27             | 54                         | 0.69                 | 0.05             | -                         | -                   | -               | 1.1      |
|                                         | 5.2   | 0.37             | 56                         | 0.60                 | 0.03             | -                         | -                   | -               | 1.2      |
|                                         | 6.2   | 0.35             | 52                         | 0.60                 | 0.05             | -                         | -                   | -               | 1.2      |
|                                         | 6.6   | 0.42             | 54                         | 0.53                 | 0.05             | -                         | -                   | -               | 1.2      |

**Table S7.** Parameters retrieved from the FBM analysis of the excimer decays for the PyEG<sub>5</sub>-PEG<sub>n</sub>MA samples in degassed DMF.

| Sample                                  | Mol % | $f_{\text{Ek2}}$ | $\tau_{\text{E0}}$<br>(ns) | $f_{\text{EdiffE0}}$ | $f_{\text{EE0}}$ | $\tau_{\text{D}}$<br>(ns) | $f_{\text{EdiffD}}$ | $f_{\text{ED}}$ | $\chi^2$ |
|-----------------------------------------|-------|------------------|----------------------------|----------------------|------------------|---------------------------|---------------------|-----------------|----------|
| PyEG <sub>5</sub> -PEG <sub>0</sub> MA  | 0.9   | 0.17             | 55                         | 0.81                 | 0.02             | -                         | -                   | -               | 1.1      |
|                                         | 2.0   | 0.27             | 50                         | 0.71                 | 0.02             | -                         | -                   | -               | 1.1      |
|                                         | 2.6   | 0.32             | 48                         | 0.65                 | 0.03             | -                         | -                   | -               | 1.1      |
|                                         | 3.3   | 0.40             | 49                         | 0.57                 | 0.03             | -                         | -                   | -               | 1.1      |
|                                         | 3.3   | 0.39             | 49                         | 0.59                 | 0.03             | -                         | -                   | -               | 1.1      |
| PyEG <sub>5</sub> -PEG <sub>3</sub> MA  | 2.0   | 0.20             | 46                         | 0.64                 | 0.02             | 83                        | 0.10                | 0.04            | 1.2      |
|                                         | 2.1   | 0.20             | 55                         | 0.49                 | 0.20             | 99                        | 0.08                | 0.03            | 1.2      |
|                                         | 3.0   | 0.26             | 49                         | 0.64                 | 0.04             | 73                        | 0.05                | 0.01            | 1.1      |
|                                         | 3.4   | 0.31             | 46                         | 0.45                 | 0.04             | 61                        | 0.20                | 0.00            | 1.1      |
|                                         | 3.8   | 0.36             | 48                         | 0.41                 | 0.02             | 52                        | 0.21                | 0.00            | 1.1      |
| PyEG <sub>5</sub> -PEG <sub>4</sub> MA  | 1.2   | 0.19             | 44                         | 0.51                 | 0.01             | 70                        | 0.28                | 0.00            | 1.1      |
|                                         | 1.9   | 0.23             | 48                         | 0.52                 | 0.02             | 69                        | 0.24                | 0.00            | 1.1      |
|                                         | 2.2   | 0.20             | 38                         | 0.55                 | 0.01             | 65                        | 0.24                | 0.01            | 1.1      |
|                                         | 2.4   | 0.23             | 41                         | 0.48                 | 0.04             | 62                        | 0.25                | 0.00            | 1.1      |
|                                         | 3.1   | 0.29             | 42                         | 0.44                 | 0.02             | 60                        | 0.25                | 0.00            | 1.1      |
| PyEG <sub>5</sub> -PEG <sub>5</sub> MA  | 2.2   | 0.24             | 45                         | 0.51                 | 0.00             | 62                        | 0.23                | 0.02            | 1.0      |
|                                         | 3.2   | 0.32             | 50                         | 0.65                 | 0.02             | 128                       | 0.00                | 0.01            | 1.0      |
|                                         | 3.6   | 0.32             | 47                         | 0.47                 | 0.03             | 57                        | 0.18                | 0.00            | 1.0      |
|                                         | 4.8   | 0.39             | 45                         | 0.45                 | 0.00             | 61                        | 0.13                | 0.03            | 1.1      |
|                                         | 6.5   | 0.47             | 49                         | 0.30                 | 0.01             | 49                        | 0.20                | 0.02            | 1.2      |
| PyEG <sub>5</sub> -PEG <sub>7</sub> MA  | 2.2   | 0.25             | 18                         | 0.20                 | 0.02             | 57                        | 0.53                | 0.00            | 1.1      |
|                                         | 3.0   | 0.34             | 54                         | 0.43                 | 0.04             | 64                        | 0.20                | 0.00            | 1.1      |
|                                         | 3.6   | 0.33             | 49                         | 0.46                 | 0.04             | 66                        | 0.18                | 0.00            | 1.2      |
|                                         | 4.2   | 0.40             | 51                         | 0.31                 | 0.04             | 61                        | 0.25                | 0.00            | 1.1      |
| PyEG <sub>5</sub> -PEG <sub>9</sub> MA  | 2.9   | 0.17             | 53                         | 0.82                 | 0.01             | -                         | -                   | -               | 1.0      |
|                                         | 5.2   | 0.24             | 53                         | 0.75                 | 0.02             | -                         | -                   | -               | 1.1      |
|                                         | 5.8   | 0.26             | 54                         | 0.72                 | 0.02             | -                         | -                   | -               | 1.1      |
|                                         | 7.4   | 0.30             | 52                         | 0.68                 | 0.02             | -                         | -                   | -               | 1.1      |
|                                         | 10.2  | 0.42             | 51                         | 0.55                 | 0.02             | -                         | -                   | -               | 1.2      |
| PyEG <sub>5</sub> -PEG <sub>19</sub> MA | 2.1   | 0.20             | 61                         | 0.78                 | 0.02             | -                         | -                   | -               | 1.1      |
|                                         | 3.2   | 0.22             | 56                         | 0.76                 | 0.02             | -                         | -                   | -               | 1.1      |
|                                         | 4.4   | 0.27             | 61                         | 0.71                 | 0.02             | -                         | -                   | -               | 1.2      |
|                                         | 5.2   | 0.31             | 54                         | 0.67                 | 0.03             | -                         | -                   | -               | 1.1      |
|                                         | 6.2   | 0.30             | 49                         | 0.68                 | 0.02             | -                         | -                   | -               | 1.0      |
|                                         | 6.6   | 0.37             | 55                         | 0.60                 | 0.03             | -                         | -                   | -               | 1.2      |

**Table S8.** Parameters retrieved from the FBM analysis of the excimer decays for the PyEG<sub>5</sub>-PEG<sub>n</sub>MA samples in aerated DMSO.

| Sample                                                             | Mol % | $f_{\text{Ek2}}$ | $\tau_{\text{E0}}$ (ns) | $f_{\text{EdiffE0}}$ | $f_{\text{EE0}}$ | $\tau_{\text{D}}$ (ns) | $f_{\text{EdiffD}}$ | $f_{\text{ED}}$ | $f_{\text{ES}}$ | $\chi^2$ |
|--------------------------------------------------------------------|-------|------------------|-------------------------|----------------------|------------------|------------------------|---------------------|-----------------|-----------------|----------|
| PyEG <sub>5</sub> -PEG <sub>0</sub> MA                             | 0.9   | 0.08             | 40                      | 0.90                 | 0.02             | -                      | -                   | -               | -               | 1.1      |
|                                                                    | 2.0   | 0.14             | 39                      | 0.84                 | 0.02             | -                      | -                   | -               | -               | 1.1      |
|                                                                    | 2.6   | 0.17             | 38                      | 0.81                 | 0.03             | -                      | -                   | -               | -               | 1.2      |
|                                                                    | 3.3   | 0.19             | 39                      | 0.78                 | 0.03             | -                      | -                   | -               | -               | 1.1      |
|                                                                    | 3.3   | 0.21             | 41                      | 0.76                 | 0.03             | -                      | -                   | -               | -               | 1.2      |
| PyEG <sub>5</sub> -PEG <sub>3</sub> MA                             | 1.6   | 0.10             | 41                      | 0.81                 | 0.09             | -                      | -                   | -               | -               | 1.2      |
|                                                                    | 2.0   | 0.14             | 39                      | 0.80                 | 0.05             | -                      | -                   | -               | -               | 1.1      |
|                                                                    | 3.0   | 0.18             | 39                      | 0.78                 | 0.05             | -                      | -                   | -               | -               | 1.1      |
|                                                                    | 3.4   | 0.21             | 39                      | 0.75                 | 0.04             | -                      | -                   | -               | -               | 1.1      |
|                                                                    | 3.8   | 0.24             | 38                      | 0.73                 | 0.03             | -                      | -                   | -               | -               | 1.0      |
| PyEG <sub>5</sub> -PEG <sub>4</sub> MA                             | 1.2   | 0.10             | 40                      | 0.88                 | 0.02             | -                      | -                   | -               | -               | 1.1      |
|                                                                    | 1.9   | 0.13             | 40                      | 0.85                 | 0.03             | -                      | -                   | -               | -               | 1.1      |
|                                                                    | 2.2   | 0.13             | 38                      | 0.85                 | 0.02             | -                      | -                   | -               | -               | 1.1      |
|                                                                    | 2.4   | 0.14             | 39                      | 0.81                 | 0.05             | -                      | -                   | -               | -               | 1.2      |
|                                                                    | 3.1   | 0.17             | 39                      | 0.81                 | 0.02             | -                      | -                   | -               | -               | 1.1      |
| PyEG <sub>5</sub> -PEG <sub>5</sub> MA                             | 2.2   | 0.15             | 43                      | 0.82                 | 0.02             | -                      | -                   | -               | -               | 1.1      |
|                                                                    | 3.2   | 0.19             | 44                      | 0.77                 | 0.03             | -                      | -                   | -               | -               | 1.1      |
|                                                                    | 3.6   | 0.21             | 43                      | 0.76                 | 0.03             |                        |                     |                 | -               | 1.1      |
|                                                                    | 4.8   | 0.24             | 42                      | 0.73                 | 0.03             | -                      | -                   | -               | -               | 1.1      |
|                                                                    | 6.5   | 0.29             | 42                      | 0.67                 | 0.03             | -                      | -                   | -               | -               | 1.2      |
| PyEG <sub>5</sub> -PEG <sub>7</sub> MA<br>$\tau_{\text{S}} = 4$ ns | 2.2   | 0.19             | 49                      | 0.74                 | 0.04             | -                      | -                   | -               | 0.03            | 1.0      |
|                                                                    | 3.0   | 0.21             | 48                      | 0.72                 | 0.03             | -                      | -                   | -               | 0.04            | 1.0      |
|                                                                    | 3.6   | 0.21             | 43                      | 0.75                 | 0.03             | -                      | -                   | -               | 0.01            | 1.1      |
|                                                                    | 4.2   | 0.23             | 45                      | 0.71                 | 0.04             | -                      | -                   | -               | 0.02            | 1.1      |
| PyEG <sub>5</sub> -PEG <sub>9</sub> MA                             | 2.9   | 0.12             | 44                      | 0.85                 | 0.02             | -                      | -                   | -               | -               | 1.1      |
|                                                                    | 5.2   | 0.18             | 42                      | 0.80                 | 0.02             | -                      | -                   | -               | -               | 1.1      |
|                                                                    | 5.8   | 0.19             | 42                      | 0.79                 | 0.02             | -                      | -                   | -               | -               | 1.1      |
|                                                                    | 7.4   | 0.22             | 41                      | 0.75                 | 0.03             | -                      | -                   | -               | -               | 1.1      |
|                                                                    | 10.2  | 0.30             | 41                      | 0.67                 | 0.04             | -                      | -                   | -               | -               | 1.2      |
| PyEG <sub>5</sub> -PEG <sub>19</sub> MA                            | 2.1   | 0.12             | 60                      | 0.85                 | 0.03             | -                      | -                   | -               | -               | 1.1      |
|                                                                    | 3.2   | 0.13             | 57                      | 0.83                 | 0.03             | -                      | -                   | -               | -               | 1.2      |
|                                                                    | 5.2   | 0.18             | 49                      | 0.79                 | 0.03             | -                      | -                   | -               | -               | 1.0      |
|                                                                    | 6.2   | 0.17             | 44                      | 0.81                 | 0.02             | -                      | -                   | -               | -               | 1.1      |
|                                                                    | 6.6   | 0.19             | 48                      | 0.77                 | 0.03             | -                      | -                   | -               | -               | 1.2      |



**Table S9.** Molar fractions retrieved from the FBM analysis of the monomer and excimer decays for the PyEG<sub>5</sub>-PEG<sub>n</sub>MA samples in degassed acetonitrile.

| Sample                                  | Mol % | $f_{\text{free}}$ | $f_{\text{agg}}$ | $f_{\text{diff}}$ | $f_{k2}$ | $\chi^2$ |
|-----------------------------------------|-------|-------------------|------------------|-------------------|----------|----------|
| PyEG <sub>5</sub> -PEG <sub>0</sub> MA  | 0.9   | 0.06              | 0.03             | 0.75              | 0.16     | 1.0      |
|                                         | 2.0   | 0.01              | 0.10             | 0.69              | 0.19     | 1.2      |
|                                         | 3.0   | 0.01              | 0.12             | 0.64              | 0.22     | 1.1      |
|                                         | 3.4   | 0.00              | 0.20             | 0.55              | 0.25     | 1.2      |
|                                         | 3.8   | 0.00              | 0.17             | 0.58              | 0.25     | 1.1      |
| PyEG <sub>5</sub> -PEG <sub>3</sub> MA  | 2.0   | 0.05              | 0.06             | 0.61              | 0.28     | 1.0      |
|                                         | 2.1   | 0.06              | 0.15             | 0.51              | 0.27     | 1.1      |
|                                         | 3.0   | 0.01              | 0.06             | 0.55              | 0.38     | 1.1      |
|                                         | 3.4   | 0.01              | 0.08             | 0.47              | 0.44     | 1.1      |
|                                         | 3.8   | 0.01              | 0.11             | 0.41              | 0.47     | 1.0      |
| PyEG <sub>5</sub> -PEG <sub>4</sub> MA  | 1.2   | 0.14              | 0.02             | 0.63              | 0.21     | 1.2      |
|                                         | 1.9   | 0.09              | 0.03             | 0.64              | 0.24     | 1.1      |
|                                         | 2.2   | 0.06              | 0.03             | 0.61              | 0.30     | 1.0      |
|                                         | 2.4   | 0.05              | 0.05             | 0.58              | 0.33     | 1.2      |
|                                         | 3.1   | 0.02              | 0.06             | 0.54              | 0.38     | 1.0      |
| PyEG <sub>5</sub> -PEG <sub>5</sub> MA  | 2.2   | 0.09              | 0.03             | 0.65              | 0.23     | 1.1      |
|                                         | 3.2   | 0.02              | 0.04             | 0.50              | 0.45     | 1.2      |
|                                         | 3.6   | 0.02              | 0.05             | 0.59              | 0.34     | 1.1      |
|                                         | 4.8   | 0.01              | 0.06             | 0.53              | 0.40     | 1.2      |
|                                         | 6.5   | 0.01              | 0.08             | 0.66              | 0.29     | 1.1      |
| PyEG <sub>5</sub> -PEG <sub>7</sub> MA  | 2.2   | 0.06              | 0.05             | 0.65              | 0.24     | 1.2      |
|                                         | 3.0   | 0.03              | 0.04             | 0.62              | 0.31     | 1.1      |
|                                         | 3.6   | 0.02              | 0.02             | 0.63              | 0.33     | 1.2      |
|                                         | 4.2   | 0.02              | 0.05             | 0.57              | 0.37     | 1.2      |
| PyEG <sub>5</sub> -PEG <sub>9</sub> MA  | 2.9   | 0.11              | 0.03             | 0.65              | 0.21     | 1.1      |
|                                         | 5.2   | 0.02              | 0.06             | 0.58              | 0.34     | 1.1      |
|                                         | 5.8   | 0.02              | 0.05             | 0.53              | 0.40     | 1.2      |
|                                         | 7.4   | 0.01              | 0.07             | 0.47              | 0.44     | 1.1      |
|                                         | 10.2  | 0.00              | 0.10             | 0.33              | 0.57     | 1.1      |
| PyEG <sub>5</sub> -PEG <sub>19</sub> MA | 2.1   | 0.28              | 0.02             | 0.53              | 0.16     | 1.1      |
|                                         | 3.2   | 0.14              | 0.03             | 0.60              | 0.23     | 1.2      |
|                                         | 5.2   | 0.08              | 0.05             | 0.53              | 0.34     | 1.1      |
|                                         | 6.2   | 0.03              | 0.05             | 0.55              | 0.37     | 1.1      |
|                                         | 6.6   | 0.04              | 0.06             | 0.49              | 0.41     | 1.1      |

**Table S10.** Molar fractions retrieved from the FBM analysis of the monomer and excimer decays for the PyEG<sub>5</sub>-PEG<sub>n</sub>MA samples in degassed THF.

| Sample                                  | Mol % | $f_{\text{free}}$ | $f_{\text{agg}}$ | $f_{\text{diff}}$ | $f_{k2}$ | $\chi^2$ |
|-----------------------------------------|-------|-------------------|------------------|-------------------|----------|----------|
| PyEG <sub>5</sub> -PEG <sub>0</sub> MA  | 0.9   | 0.14              | 0.01             | 0.76              | 0.15     | 1.2      |
|                                         | 2.0   | 0.03              | 0.01             | 0.84              | 0.33     | 1.1      |
|                                         | 2.6   | 0.02              | 0.03             | 0.82              | 0.45     | 1.1      |
|                                         | 3.3   | 0.00              | 0.02             | 0.82              | 0.62     | 1.1      |
|                                         | 3.3   | 0.00              | 0.03             | 0.82              | 0.58     | 1.2      |
| PyEG <sub>5</sub> -PEG <sub>3</sub> MA  | 2.0   | 0.06              | 0.07             | 0.62              | 0.25     | 1.1      |
|                                         | 2.1   | 0.05              | 0.17             | 0.56              | 0.21     | 1.1      |
|                                         | 3.0   | 0.02              | 0.06             | 0.58              | 0.34     | 1.1      |
|                                         | 3.4   | 0.01              | 0.06             | 0.53              | 0.41     | 1.1      |
|                                         | 3.8   | 0.00              | 0.08             | 0.47              | 0.44     | 1.1      |
| PyEG <sub>5</sub> -PEG <sub>4</sub> MA  | 1.2   | 0.17              | 0.03             | 0.64              | 0.16     | 1.2      |
|                                         | 1.9   | 0.16              | 0.03             | 0.60              | 0.20     | 1.1      |
|                                         | 2.2   | 0.09              | 0.02             | 0.66              | 0.23     | 1.1      |
|                                         | 2.4   | 0.06              | 0.05             | 0.63              | 0.26     | 1.0      |
|                                         | 3.1   | 0.02              | 0.02             | 0.60              | 0.36     | 1.1      |
| PyEG <sub>5</sub> -PEG <sub>5</sub> MA  | 2.2   | 0.10              | 0.02             | 0.66              | 0.22     | 1.2      |
|                                         | 3.2   | 0.03              | 0.03             | 0.61              | 0.33     | 1.1      |
|                                         | 3.6   | 0.03              | 0.03             | 0.62              | 0.33     | 1.1      |
|                                         | 4.8   | 0.01              | 0.03             | 0.55              | 0.41     | 1.1      |
|                                         | 6.5   | 0.00              | 0.05             | 0.47              | 0.48     | 1.0      |
| PyEG <sub>5</sub> -PEG <sub>7</sub> MA  | 2.2   | 0.15              | 0.02             | 0.60              | 0.23     | 1.1      |
|                                         | 3.0   | 0.07              | 0.03             | 0.61              | 0.29     | 1.1      |
|                                         | 3.6   | 0.05              | 0.03             | 0.62              | 0.30     | 1.1      |
|                                         | 4.2   | 0.04              | 0.04             | 0.56              | 0.37     | 1.1      |
| PyEG <sub>5</sub> -PEG <sub>9</sub> MA  | 2.9   | 0.12              | 0.03             | 0.63              | 0.22     | 1.1      |
|                                         | 5.2   | 0.02              | 0.03             | 0.60              | 0.35     | 1.1      |
|                                         | 5.8   | 0.02              | 0.01             | 0.57              | 0.40     | 1.1      |
|                                         | 7.4   | 0.01              | 0.05             | 0.51              | 0.44     | 1.1      |
|                                         | 10.2  | 0.00              | 0.08             | 0.37              | 0.55     | 1.1      |
| PyEG <sub>5</sub> -PEG <sub>19</sub> MA | 2.1   | 0.30              | 0.01             | 0.52              | 0.16     | 1.2      |
|                                         | 3.2   | 0.13              | 0.03             | 0.60              | 0.24     | 1.2      |
|                                         | 4.4   | 0.12              | 0.04             | 0.61              | 0.23     | 1.1      |
|                                         | 5.2   | 0.08              | 0.03             | 0.54              | 0.34     | 1.2      |
|                                         | 6.2   | 0.03              | 0.05             | 0.58              | 0.34     | 1.2      |
|                                         | 6.6   | 0.03              | 0.04             | 0.52              | 0.41     | 1.2      |

**Table S11.** Molar fractions retrieved from the FBM analysis of the monomer and excimer decays for the PyEG<sub>5</sub>-PEG<sub>n</sub>MA samples in degassed DMF.

| Sample                                  | Mol % | $f_{\text{free}}$ | $f_{\text{agg}}$ | $f_{\text{diff}}$ | $f_{k2}$ |     |
|-----------------------------------------|-------|-------------------|------------------|-------------------|----------|-----|
| PyEG <sub>5</sub> -PEG <sub>0</sub> MA  | 0.9   | 0.16              | 0.02             | 0.75              | 0.16     | 1.1 |
|                                         | 2.0   | 0.03              | 0.02             | 0.85              | 0.32     | 1.1 |
|                                         | 2.6   | 0.02              | 0.03             | 0.84              | 0.42     | 1.1 |
|                                         | 3.3   | 0.00              | 0.04             | 0.84              | 0.59     | 1.1 |
|                                         | 3.3   | 0.00              | 0.04             | 0.84              | 0.56     | 1.1 |
| PyEG <sub>5</sub> -PEG <sub>3</sub> MA  | 2.0   | 0.10              | 0.05             | 0.66              | 0.18     | 1.2 |
|                                         | 2.1   | 0.12              | 0.20             | 0.50              | 0.17     | 1.2 |
|                                         | 3.0   | 0.04              | 0.05             | 0.66              | 0.25     | 1.1 |
|                                         | 3.4   | 0.02              | 0.04             | 0.64              | 0.31     | 1.1 |
|                                         | 3.8   | 0.01              | 0.02             | 0.61              | 0.36     | 1.1 |
| PyEG <sub>5</sub> -PEG <sub>4</sub> MA  | 1.2   | 0.21              | 0.01             | 0.62              | 0.15     | 1.1 |
|                                         | 1.9   | 0.16              | 0.02             | 0.64              | 0.19     | 1.1 |
|                                         | 2.2   | 0.12              | 0.01             | 0.70              | 0.18     | 1.1 |
|                                         | 2.4   | 0.09              | 0.04             | 0.66              | 0.20     | 1.1 |
|                                         | 3.1   | 0.04              | 0.02             | 0.66              | 0.28     | 1.1 |
| PyEG <sub>5</sub> -PEG <sub>5</sub> MA  | 2.2   | 0.11              | 0.02             | 0.66              | 0.21     | 1.0 |
|                                         | 3.2   | 0.04              | 0.02             | 0.63              | 0.31     | 1.0 |
|                                         | 3.6   | 0.04              | 0.03             | 0.63              | 0.31     | 1.0 |
|                                         | 4.8   | 0.02              | 0.03             | 0.57              | 0.38     | 1.1 |
|                                         | 6.5   | 0.00              | 0.03             | 0.50              | 0.47     | 1.2 |
| PyEG <sub>5</sub> -PEG <sub>7</sub> MA  | 2.2   | 0.17              | 0.02             | 0.61              | 0.21     | 1.1 |
|                                         | 3.0   | 0.10              | 0.03             | 0.56              | 0.30     | 1.1 |
|                                         | 3.6   | 0.06              | 0.03             | 0.60              | 0.31     | 1.2 |
|                                         | 4.2   | 0.04              | 0.04             | 0.53              | 0.38     | 1.1 |
| PyEG <sub>5</sub> -PEG <sub>9</sub> MA  | 2.9   | 0.16              | 0.01             | 0.69              | 0.14     | 1.0 |
|                                         | 5.2   | 0.05              | 0.01             | 0.71              | 0.23     | 1.1 |
|                                         | 5.8   | 0.05              | 0.02             | 0.68              | 0.25     | 1.1 |
|                                         | 7.4   | 0.05              | 0.02             | 0.64              | 0.29     | 1.1 |
|                                         | 10.2  | 0.01              | 0.02             | 0.55              | 0.42     | 1.2 |
| PyEG <sub>5</sub> -PEG <sub>19</sub> MA | 2.1   | 0.35              | 0.02             | 0.51              | 0.13     | 1.1 |
|                                         | 3.2   | 0.18              | 0.02             | 0.62              | 0.18     | 1.1 |
|                                         | 4.4   | 0.12              | 0.02             | 0.62              | 0.24     | 1.2 |
|                                         | 5.2   | 0.11              | 0.02             | 0.59              | 0.27     | 1.1 |
|                                         | 6.2   | 0.05              | 0.02             | 0.64              | 0.28     | 1.0 |
|                                         | 6.6   | 0.04              | 0.03             | 0.57              | 0.36     | 1.2 |

**Table S12.** Molar fractions retrieved from the FBM analysis of the monomer and excimer decays for the PyEG<sub>5</sub>-PEG<sub>n</sub>MA samples in aerated DMSO.

| Sample                                  | Mol % | $f_{\text{free}}$ | $f_{\text{agg}}$ | $f_{\text{diff}}$ | $f_{k2}$ | $\chi^2$ |
|-----------------------------------------|-------|-------------------|------------------|-------------------|----------|----------|
| PyEG <sub>5</sub> -PEG <sub>0</sub> MA  | 0.9   | 0.17              | 0.02             | 0.70              | 0.11     | 1.1      |
|                                         | 2.0   | 0.04              | 0.02             | 0.80              | 0.14     | 1.1      |
|                                         | 2.6   | 0.03              | 0.03             | 0.80              | 0.14     | 1.2      |
|                                         | 3.3   | 0.01              | 0.03             | 0.81              | 0.15     | 1.1      |
|                                         | 3.3   | 0.02              | 0.03             | 0.80              | 0.15     | 1.2      |
| PyEG <sub>5</sub> -PEG <sub>3</sub> MA  | 1.6   | 0.22              | 0.07             | 0.63              | 0.08     | 1.2      |
|                                         | 2.0   | 0.07              | 0.05             | 0.74              | 0.13     | 1.1      |
|                                         | 3.0   | 0.05              | 0.04             | 0.74              | 0.17     | 1.1      |
|                                         | 3.4   | 0.04              | 0.04             | 0.72              | 0.21     | 1.1      |
|                                         | 3.8   | 0.02              | 0.03             | 0.71              | 0.23     | 1.0      |
| PyEG <sub>5</sub> -PEG <sub>4</sub> MA  | 1.2   | 0.20              | 0.02             | 0.70              | 0.08     | 1.1      |
|                                         | 1.9   | 0.17              | 0.02             | 0.70              | 0.10     | 1.1      |
|                                         | 2.2   | 0.17              | 0.02             | 0.70              | 0.10     | 1.1      |
|                                         | 2.4   | 0.10              | 0.04             | 0.73              | 0.13     | 1.2      |
|                                         | 3.1   | 0.09              | 0.02             | 0.74              | 0.16     | 1.1      |
| PyEG <sub>5</sub> -PEG <sub>5</sub> MA  | 2.2   | 0.16              | 0.02             | 0.69              | 0.13     | 1.1      |
|                                         | 3.2   | 0.07              | 0.03             | 0.72              | 0.18     | 1.1      |
|                                         | 3.6   | 0.05              | 0.03             | 0.72              | 0.20     | 1.1      |
|                                         | 4.8   | 0.02              | 0.03             | 0.72              | 0.23     | 1.1      |
|                                         | 6.5   | 0.02              | 0.03             | 0.66              | 0.29     | 1.2      |
| PyEG <sub>5</sub> -PEG <sub>7</sub> MA  | 2.2   | 0.04              | 0.03             | 0.71              | 0.18     | 1.0      |
|                                         | 3.0   | 0.04              | 0.03             | 0.72              | 0.20     | 1.0      |
|                                         | 3.6   | 0.04              | 0.02             | 0.72              | 0.20     | 1.1      |
|                                         | 4.2   | 0.03              | 0.04             | 0.70              | 0.23     | 1.1      |
| PyEG <sub>5</sub> -PEG <sub>9</sub> MA  | 2.9   | 0.20              | 0.02             | 0.68              | 0.10     | 1.1      |
|                                         | 5.2   | 0.07              | 0.02             | 0.75              | 0.16     | 1.1      |
|                                         | 5.8   | 0.06              | 0.02             | 0.74              | 0.18     | 1.1      |
|                                         | 7.4   | 0.02              | 0.03             | 0.74              | 0.22     | 1.1      |
|                                         | 10.2  | 0.00              | 0.04             | 0.67              | 0.30     | 1.2      |
| PyEG <sub>5</sub> -PEG <sub>19</sub> MA | 2.1   | 0.44              | 0.02             | 0.47              | 0.07     | 1.1      |
|                                         | 3.2   | 0.32              | 0.02             | 0.57              | 0.09     | 1.2      |
|                                         | 5.2   | 0.15              | 0.03             | 0.67              | 0.15     | 1.0      |
|                                         | 6.2   | 0.12              | 0.02             | 0.71              | 0.15     | 1.1      |
|                                         | 6.6   | 0.02              | 0.03             | 0.76              | 0.19     | 1.2      |

## G] References

1. Duhamel, J. New Insights in the Study of Pyrene Excimer Fluorescence to Characterize Macromolecules and their Supramolecular Assemblies in Solution. *Langmuir* **2012**, 28, 6527-6538.
2. Duhamel, J. Global Analysis of Fluorescence Decays to Probe the Internal Dynamics of Fluorescently Labeled Macromolecules. *Langmuir* **2014**, 30, 2307-2324.
